# Supplementary material for: A versatile fluorinated azamacrocyclic chelator enabling 18F PET or 19F MRI: a first step towards new multimodal and smart contrast agents
Source: Royal Society of Chemistry journal article supplement (doi:10.1039/d4sc02871f), 2024-01-01
Supplement: d4sc02871f1.pdf [file d4sc02871f1.pdf]

# A versatile fluorinated azamacrocyclic chelator enabling $^{18}\text{F}$ PET or $^{19}\text{F}$ MRI : a first step towards new multimodal and smart contrast agents.

Charline Sire,<sup>a</sup> Vincent Meneyrol,<sup>b</sup> Nathalie Saffon-Merceron,<sup>c</sup> Enzo Terreno,<sup>d</sup> Francesca Garelo,<sup>d</sup> Lorenzo Tei,<sup>e</sup> Emmanuelle Jestin,<sup>b</sup> Raphaël Tripier<sup>a</sup> and Thibault Troadec<sup>\*a</sup>

<sup>a</sup> Univ. Brest, UMR CNRS 6521 CEMCA, 6 Avenue Victor Le Gorgeu, 29200 Brest, France.

E-mail: [Thibault.troadec@univ-brest.fr](mailto:Thibault.troadec@univ-brest.fr)

<sup>b</sup> Cyclotron Réunion Océan Indien CYROI, 2 rue Maxime Rivière 97490 Sainte-Clotilde, France.

<sup>c</sup> Institut de Chimie de Toulouse (UAR 2599), 118 route de Narbonne, 31062 Toulouse Cedex 9, France.

<sup>d</sup> Department of Molecular Biotechnology and Health Sciences, University of Turin, Piazza Nizza 44/bis, 10126 Turin (Italy).

<sup>e</sup> Dipartimento di Scienze ed Innovazione Tecnologica, Università del Piemonte Orientale "Amedeo Avogadro", Viale T. Michel 11, 15121 Alessandria, Italy.

Corresponding author e-mail: [Thibault.troadec@univ-brest.fr](mailto:Thibault.troadec@univ-brest.fr)

## Electronic Supporting Information

|                                                                                                                                                     |    |
|-----------------------------------------------------------------------------------------------------------------------------------------------------|----|
| <b>General considerations</b> .....                                                                                                                 | 2  |
| <b>Synthesis and characterization of <math>\text{H}_2\text{Do2py2BF}_3</math></b> :.....                                                            | 3  |
| Figure S1 - $^1\text{H}$ NMR (400.16 MHz) of Do2py2BP in intermediate .....                                                                         | 3  |
| Figure S2 - $^1\text{H}$ NMR (400.16 MHz) of $\text{H}_2\text{Do2py2BF}_3$ .....                                                                    | 5  |
| Figure S3 - $^{19}\text{F}$ NMR (376.53 MHz) of $\text{H}_2\text{Do2py2BF}_3$ .....                                                                 | 6  |
| Figure S4 - $^{11}\text{B}$ NMR (128.39 MHz) of $\text{H}_2\text{Do2py2BF}_3$ .....                                                                 | 7  |
| Figure S5 - $^{13}\text{C}$ (JMod) NMR (125.79 MHz) of $\text{H}_2\text{Do2py2BF}_3$ at pH 4 ( $\text{D}_2\text{O}/\text{CD}_3\text{CN}$ 1:1) ..... | 7  |
| Figure S6 - $^{11}\text{B}$ - $^1\text{H}$ HMBC NMR of $\text{H}_2\text{Do2py2BF}_3$ .....                                                          | 8  |
| Figure S7 - COSY NMR of $\text{H}_2\text{Do2py2BF}_3$ .....                                                                                         | 8  |
| Figure S8 - $^{13}\text{C}$ - $^1\text{H}$ HSQC NMR of $\text{H}_2\text{Do2py2BF}_3$ .....                                                          | 9  |
| Figure S9 - ESI-HRMS (Positive ions) of $\text{H}_2\text{Do2py2BF}_3$ .....                                                                         | 10 |
| Figure S10 - ESI-HRMS (Negative ions) of $\text{H}_2\text{Do2py2BF}_3$ .....                                                                        | 11 |
| <b>Synthesis and characterization of <math>\text{Zn}(\text{Do2py2BF}_3)</math></b> .....                                                            | 12 |
| Figure S11 - $^1\text{H}$ NMR (400.16 MHz, $\text{D}_2\text{O}/\text{CD}_3\text{CN}$ 1 :1) of $\text{Zn}(\text{Do2py2BF}_3)$ at 298K and 333K.....  | 13 |
| Figure S12 - $^{19}\text{F}$ NMR (376.53 MHz, $\text{D}_2\text{O}/\text{CD}_3\text{CN}$ 1 :1) of $\text{Zn}(\text{Do2py2BF}_3)$ at 298K.....        | 14 |
| Figure S13 - X-Ray diffraction structure of $\text{Zn}(\text{Do2py2BF}_3)$ with calculated N1-N2-N3-N4 centroid and Zn-N distances .....            | 15 |
| Figure S14 - ESI-HRMS (Positive ions) of $\text{Zn}(\text{Do2py2BF}_3)$ .....                                                                       | 16 |
| <b>X-Ray diffraction data:</b> .....                                                                                                                | 17 |
| $\text{H}_2\text{Do2py2BF}_3$ (pH 4) .....                                                                                                          | 17 |
| Table S1 - Crystal data and structure refinement for $\text{H}_2\text{Do2py2BF}_3$ (pH 4) .....                                                     | 18 |
| $\text{H}_4\text{Do2py2BF}_3^{2+}$ (pH 1) .....                                                                                                     | 19 |
| Table S2 - Crystal data and structure refinement for $\text{H}_4\text{Do2py2BF}_3^{2+}$ (pH 1).....                                                 | 20 |

|                                                                                                         |           |
|---------------------------------------------------------------------------------------------------------|-----------|
| Zn(Do2py2BF <sub>3</sub> ) complex.....                                                                 | 21        |
| Table S3 - Crystal data and structure refinement for Zn(Do2py2BF <sub>3</sub> ).....                    | 22        |
| <b>NMR monitoring of Do2py2BF<sub>3</sub> and Zn(Do2py2BF<sub>3</sub>) pH-dependant stability .....</b> | <b>23</b> |
| Figure S15: H <sub>2</sub> Do2py2BF <sub>3</sub> ligand (pH 2, 25°C) .....                              | 23        |
| Figure S16: H <sub>2</sub> Do2py2BF <sub>3</sub> ligand (pH 7.3) .....                                  | 24        |
| Figure S17: H <sub>2</sub> Do2py2BF <sub>3</sub> ligand (pH 9.7) .....                                  | 24        |
| Figure S18: Zn(Do2py2BF <sub>3</sub> ) complex (pH 2) .....                                             | 25        |
| Figure S19: Zn(Do2py2BF <sub>3</sub> ) complex (pH 7.3) .....                                           | 26        |
| Figure S20: Zn(Do2py2BF <sub>3</sub> ) complex (pH 9.7) .....                                           | 27        |
| <b><sup>18</sup>F-Radiolabeling.....</b>                                                                | <b>28</b> |
| Figure S21: Scheme of TRACERLab FX FN module.....                                                       | 29        |
| Figure S22: HPLC analysis of H <sub>2</sub> Do2Py2BF <sub>3</sub> radiolabeling.....                    | 30        |
| Figure S23: HPLC analysis of Zn(Do2Py2BF <sub>3</sub> ) radiolabeling.....                              | 32        |
| <b><sup>19</sup>F-Magnetic Resonance .....</b>                                                          | <b>34</b> |
| Figure S24: <sup>19</sup> F Signal Intensity values at 7T .....                                         | 34        |
| <b>References .....</b>                                                                                 | <b>34</b> |

## General considerations

Reagents were purchased from Sigma-Aldrich, TCI Chemicals, Acros Organics. Dipyridylcyclen (Do2py) was prepared according to previously described procedure.<sup>[1]</sup>

NMR data were recorded at the “Service commun de RMN-RPE” at the Université de Bretagne Occidentale (UBO). <sup>1</sup>H, <sup>13</sup>C and 2D NMR spectra were recorded on Bruker Avance III HD 500 (500.13 MHz for <sup>1</sup>H, 125.79 MHz for <sup>13</sup>C, 470.59 MHz for <sup>19</sup>F and 202.46 for <sup>11</sup>B), Bruker Avance 400 or 400 Neo (400.13 MHz for <sup>1</sup>H, 100.61 MHz for <sup>13</sup>C, 376.50 MHz for <sup>19</sup>F and 161.98 for <sup>11</sup>B) or Bruker AMX-3 300 (300.13 MHz for <sup>1</sup>H, 75.47 MHz for <sup>13</sup>C and 282.40 MHz for <sup>19</sup>F) spectrometers. All <sup>13</sup>C, <sup>11</sup>B and <sup>19</sup>F spectra are proton-decoupled unless otherwise stated. Signal multiplicity are reported as follows: d = doublet, dd = doublet of doublet, t = triplet, q = quadruplet, br = broad.

High-resolution mass spectra (HRMS) were performed on a Bruker maXis mass spectrometer by the SALSA platform from ICOA laboratory (Orléans, France). Elemental analysis was conducted at CRMPO platform (ISCR, Rennes) with reported average values of 2 experiments.

Crystallographic data collection was performed at low temperature (193 K) at the Service RX of the Institut de Chimie de Toulouse, Université Paul Sabatier, on a Bruker-AXS D8-Venture diffractometer using MoK $\alpha$  radiation ( $\lambda = 0.71073 \text{ \AA}$ ) for H<sub>2</sub>Do2py2BF<sub>3</sub> and Zn(Do2py2BF<sub>3</sub>) or CuK $\alpha$  radiation ( $\lambda = 1.54178 \text{ \AA}$ ) for H<sub>4</sub>Do2py2BF<sub>3</sub><sup>2+</sup>. Phi- and omega-scans were used. The data were integrated with SAINT (Program for data reduction, Bruker-AXS) and an empirical absorption correction with SADABS was applied (Program for data correction, Bruker-AXS). The structures were solved using an intrinsic phasing method (ShelXT)<sup>55</sup> and refined using a least-squares method on F<sub>2</sub>.<sup>56</sup> All non-H atoms were refined with anisotropic displacement parameters. Hydrogen atoms were refined isotropically at calculated positions using a riding model except H atoms on nitrogen and water molecules (located by difference

Fourier maps). Some parts of the  $\text{H}_2\text{Do2py2BF}_3$  ligand and a water molecule of the  $\text{Zn}(\text{Do2py2BF}_3)$  complex were found to be disordered. Several restraints (SAME, SIMU, DELU) were applied to refine some moieties of the molecules and to avoid the collapse of the structures during the least-squares refinement by the large anisotropic displacement parameters.

CCDC 2314190 ( $\text{H}_2\text{Do2py2BF}_3$  ligand), 2314191 ( $\text{H}_4\text{Do2py2BF}_3^{2+}$  ligand) and 2314192 ( $\text{Zn}(\text{Do2py2BF}_3)$ ) contain the supplementary crystallographic data for this paper. These data can be obtained free of charge from The Cambridge Crystallographic Data Centre via <https://www.ccdc.cam.ac.uk/structures/>.

### Synthesis and characterization of $\text{H}_2\text{Do2py2BF}_3$ :

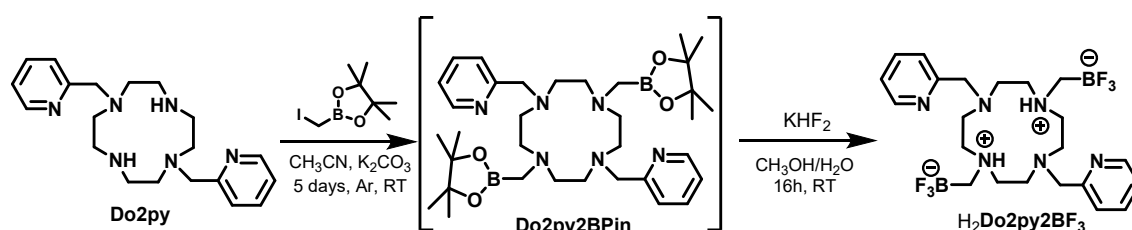

*Warning: potassium bifluoride ( $\text{KHF}_2$ ) is abrasive for glassware.*

Under argon, Do2py (0.500 g, 1.40 mmol) was placed in dry degassed acetonitrile (30 mL) with potassium carbonate (1.0 g, 5 equiv.) and a solution of iodomethylpinacolborane (0.788 g, 3.08 mmol, 2.2 equiv.) in dry acetonitrile (20 mL) was added dropwise. The mixture was stirred at RT for 3 days, then filtered to remove excess potassium carbonate and the volatiles were removed under vacuum to obtain crude **Do2py2BPin**.

**Do2py2BPin** :  $^1\text{H}$  NMR ( $\text{CD}_3\text{CN}$ , 400.13 MHz, 298 K, TMS)  $\delta$  (ppm) 8.63 (d, 2H,  $J_{\text{H-H}} = 4.8$  Hz  $\text{CH}_{\text{Ar}}$ ), 7.79 (dt, 2H,  $J_{\text{H-H}} = 7.7$  and 1.9 Hz,  $\text{CH}_{\text{Ar}}$ ), 7.34 (brt, 4H,  $J_{\text{H-H}} = 7.7$  Hz,  $\text{CH}_{\text{Ar}}$ ), 4.22 (brs, <4H,  $\text{CH}_2\text{Py}$ ), 3.40-2.45 (br, <16H,  $\text{CH}_2^{\text{cyclen}}$ ), 1.45-1.05 (br, 28H, 2 x  $\text{CH}_2\text{BPin}$  + 8 x  $\text{CH}_3^{\text{Pin}}$ )

re S1 -  $^1\text{H}$  NMR (400.16 MHz) of Do2py2BPIn intermediate

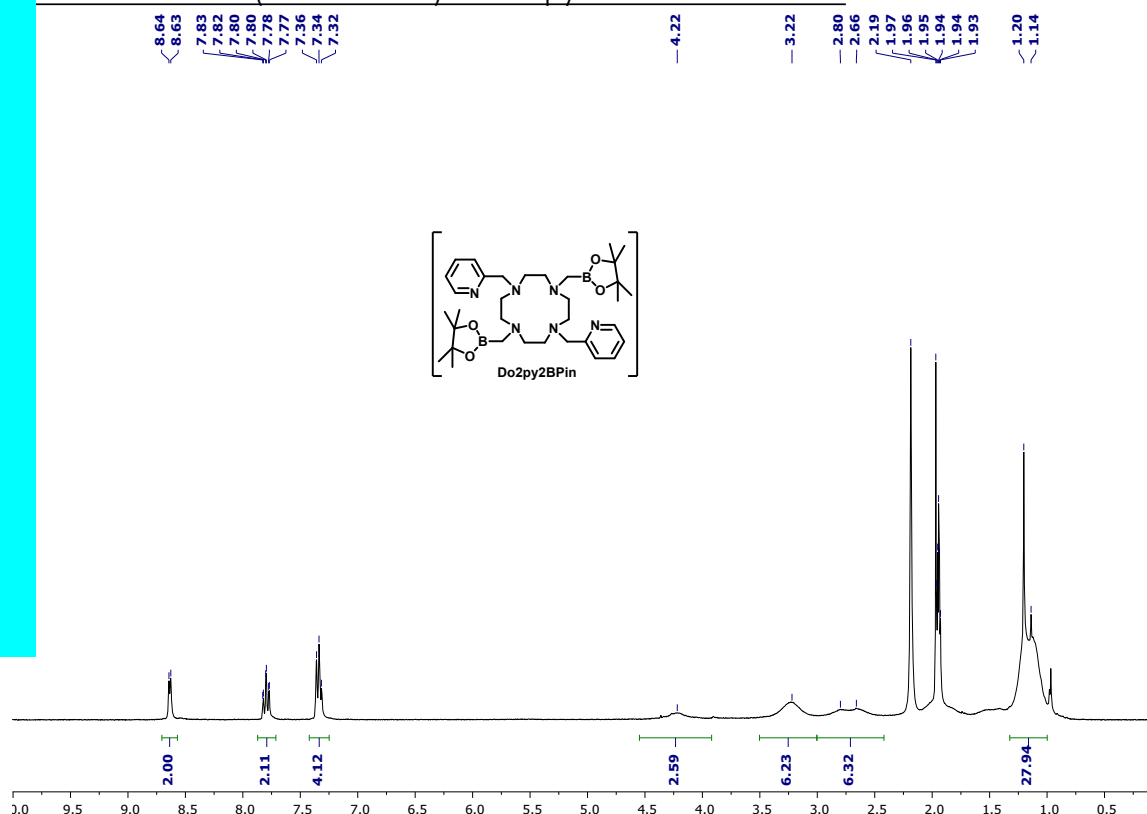

Crude **Do2py2BPIn** was redissolved in methanol (16 mL) and potassium bifluoride (1.1 g, 14 mmol, 10 equiv.) in water (4 mL) was added. The mixture was stirred at RT for 16h, then volatiles were removed under vacuum. The product was extracted with acetonitrile (2 x 10 mL), dried under vacuum, then washed with sodium thiosulfate aqueous solution (2M) (2 x 5 mL) to provide  $\text{H}_2\text{Do2py2BF}_3$  as a white powder (444 mg, 0.86 mmol, yield = 61%).

**$\text{H}_2\text{Do2py2BF}_3$  (pH 4):**

$^1\text{H}$  NMR ( $\text{D}_2\text{O}/\text{CD}_3\text{CN}$  1:1, 400.13 MHz, 298 K, TMS)  $\delta$  (ppm): 8.53 (d, 2H,  $J_{\text{H-H}} = 4.9$  Hz  $\text{CH}_{\text{Ar}}$ ), 7.78 (dt, 2H,  $J_{\text{H-H}} = 7.7$  and 1.8 Hz,  $\text{CH}_{\text{Ar}}$ ), 7.48 (d, 2H,  $J_{\text{H-H}} = 7.7$  Hz,  $\text{CH}_{\text{Ar}}$ ), 7.33 (dd, 2H,  $J_{\text{H-H}} = 7.7$  and 4.9 Hz,  $\text{CH}_{\text{Ar}}$ ), 3.92 (s, 4H,  $\text{CH}_2\text{Py}$ ), 3.28 (m, 8H,  $\text{CH}_2^{\text{cyclen}}$ ), 2.91 (m, 8H,  $\text{CH}_2^{\text{cyclen}}$ ), 1.80 (q, 4H,  $^3J_{\text{H-F}} = 5.2$  Hz,  $\text{CH}_2\text{BF}_3$ ).

$^{19}\text{F}$  NMR ( $\text{D}_2\text{O}/\text{CD}_3\text{CN}$  1:1, 376.50 MHz, 298 K,  $\text{CFCl}_3$ )  $\delta$  (ppm): -135.6 (s).

$^{11}\text{B}$  NMR ( $\text{D}_2\text{O}/\text{CD}_3\text{CN}$  1:1, 161.98 MHz, 298 K,  $\text{BF}_3\cdot\text{Et}_2\text{O}$ )  $\delta$  (ppm): 2.4 (s).

$^{13}\text{C}$  Jmod NMR ( $\text{D}_2\text{O}/\text{CD}_3\text{CN}$  1:1, 125.79 MHz, 298 K, TMS)  $\delta$  (ppm): 156.8 ( $\text{C}^{\text{Ar}}$ ), 149.2 ( $\text{CH}^{\text{Ar}}$ ), 136.7 ( $\text{CH}^{\text{Ar}}$ ), 123.1 ( $\text{CH}^{\text{Ar}}$ ), 122.2 ( $\text{CH}^{\text{Ar}}$ ), 57.2 ( $\text{CH}_2\text{Py}$ ), 51.7 ( $\text{CH}_2^{\text{cyclen}}$ ), 48.4 ( $\text{CH}_2^{\text{cyclen}}$ ), 47.8 ( $\text{CH}_2\text{BF}_3$ ).

**ESI-HR-MS (positive ions,  $M = \text{H}_2\text{Do2py2BF}_3$ ):**

m/z calcd. for  $[\text{C}_{22}\text{H}_{35}\text{B}_2\text{F}_6\text{N}_6]^+$ : 519.3008, found  $[\text{M}+\text{H}]^+$ : 519.3012.

m/z calcd. for  $[\text{C}_{22}\text{H}_{36}\text{B}_2\text{F}_6\text{N}_6]^{2+}$ : 260.1540, found  $[\text{M}+2\text{H}]^{2+}$ : 260.1542.

additional fragmentations found:  $[\text{MH}_2-\text{HF}]^{2+}$ : m/z 250.1510,  $[\text{MH}_2-2\text{HF}]^{2+}$ : m/z 240.1479.

**ESI-HR-MS (negative ions,  $M = \text{H}_2\text{Do2py2BF}_3$ ):**

m/z calcd. for  $[\text{C}_{22}\text{H}_{33}\text{B}_2\text{F}_6\text{N}_6]^-$ : 517.2862, found  $[\text{M}-\text{H}]^-$ : 517.2864.

m/z calcd. for  $[\text{C}_{22}\text{H}_{32}\text{B}_2\text{F}_6\text{N}_6\text{Na}]^-$ : 539.2682, found  $[\text{M}-2\text{H}+\text{Na}]^-$ : 539.2684.

m/z calcd. for  $[\text{C}_{22}\text{H}_{34}\text{B}_2\text{F}_6\text{N}_6\text{I}]^-$ : 645.1985, found  $[\text{M}+\text{I}]^-$ : 685.1986.

**Elemental analysis:**

calcd (%) for  $\text{C}_{22}\text{H}_{34}\text{B}_2\text{F}_6\text{N}_6$ : C 51.00, H 6.61, N 16.22; found: C 50.67, H 6.59, N 16.22

**$\text{H}_2\text{Do2py2BF}_3$  (pH 1):**

**$^1\text{H NMR}$**  ( $\text{D}_2\text{O}$ , 400.13 MHz, 298 K, TMS)  $\delta$  (ppm): 8.83 (d, 2H,  $J_{\text{H-H}} = 6.1$  Hz  $\text{CH}_{\text{Ar}}$ ), 8.63 (m, 2H,  $\text{CH}_{\text{Ar}}$ ), 8.27-8.14 (m, 2H,  $\text{CH}_{\text{Ar}}$ ), 8.05 (m, 2H,  $\text{CH}_{\text{Ar}}$ ), 4.18 (m, 4H,  $\text{CH}_2\text{Py}$ ), 3.53 (br, 8H,  $\text{CH}_2^{\text{cyclen}}$ ), 3.09 (br, 4H,  $\text{CH}_2^{\text{cyclen}}$ ), 2.93 (br, 4H,  $\text{CH}_2^{\text{cyclen}}$ ), 2.30-1.90 (brm, 4H,  $\text{CH}_2\text{BF}_3$ ).

**$^{19}\text{F NMR}$**  ( $\text{D}_2\text{O}/\text{CD}_3\text{CN}$  1:1, 376.50 MHz, 298 K,  $\text{CFCl}_3$ )  $\delta$  (ppm): -136/-139 ppm (m).

**$^{11}\text{B NMR}$**  ( $\text{D}_2\text{O}/\text{CD}_3\text{CN}$  1:1, 161.98 MHz, 298 K,  $\text{BF}_3\cdot\text{Et}_2\text{O}$ )  $\delta$  (ppm): 2.1 (s).

Figure S2 -  $^1\text{H NMR}$  (400.16 MHz) of  $\text{H}_2\text{Do}_2\text{py}_2\text{BF}_3$

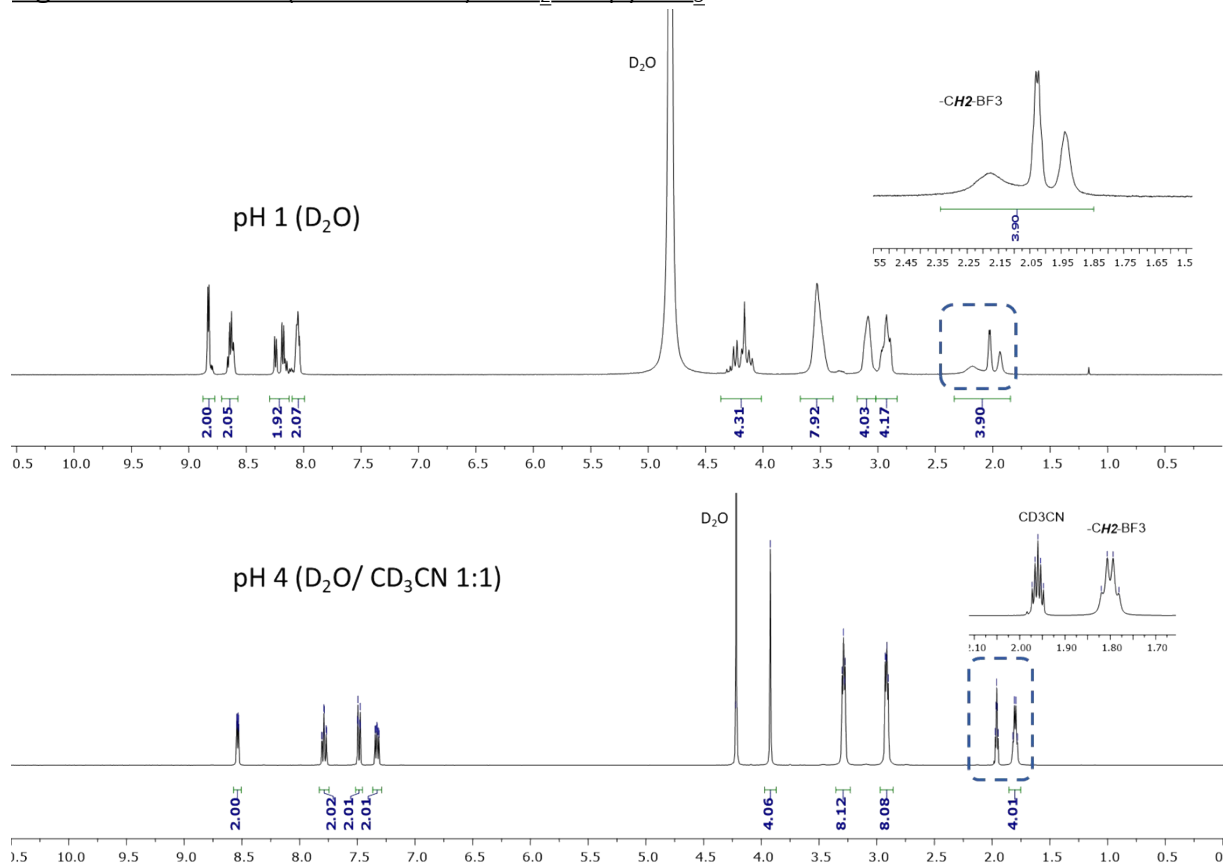

Figure S3 -  $^{19}\text{F}$  NMR (376.53 MHz) of  $\text{H}_2\text{Do2py2BF}_3$

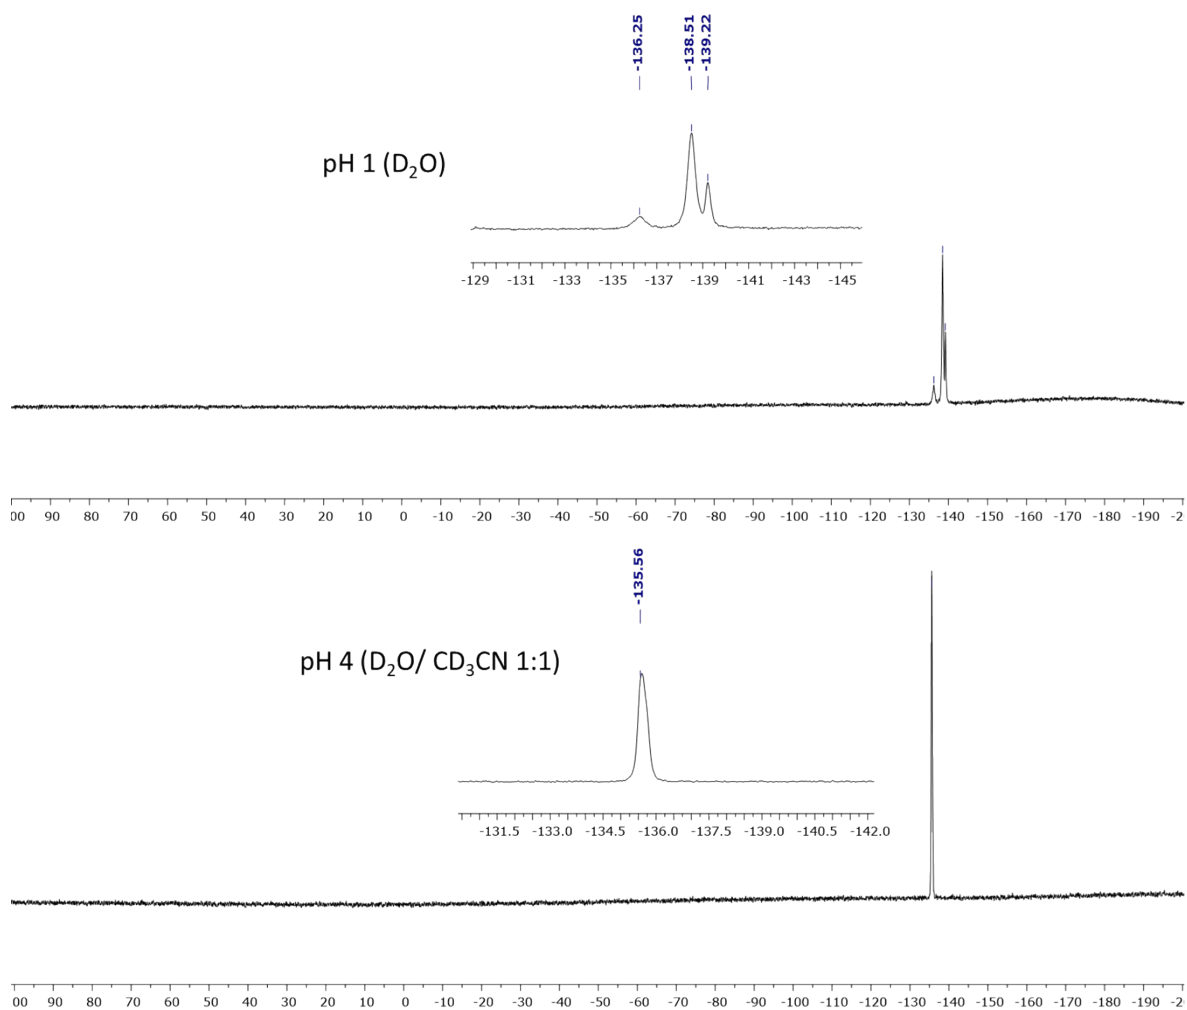

Figure S4 -  $^{11}\text{B}$  NMR (128.39 MHz) of  $\text{H}_2\text{Do2py2BF}_3$

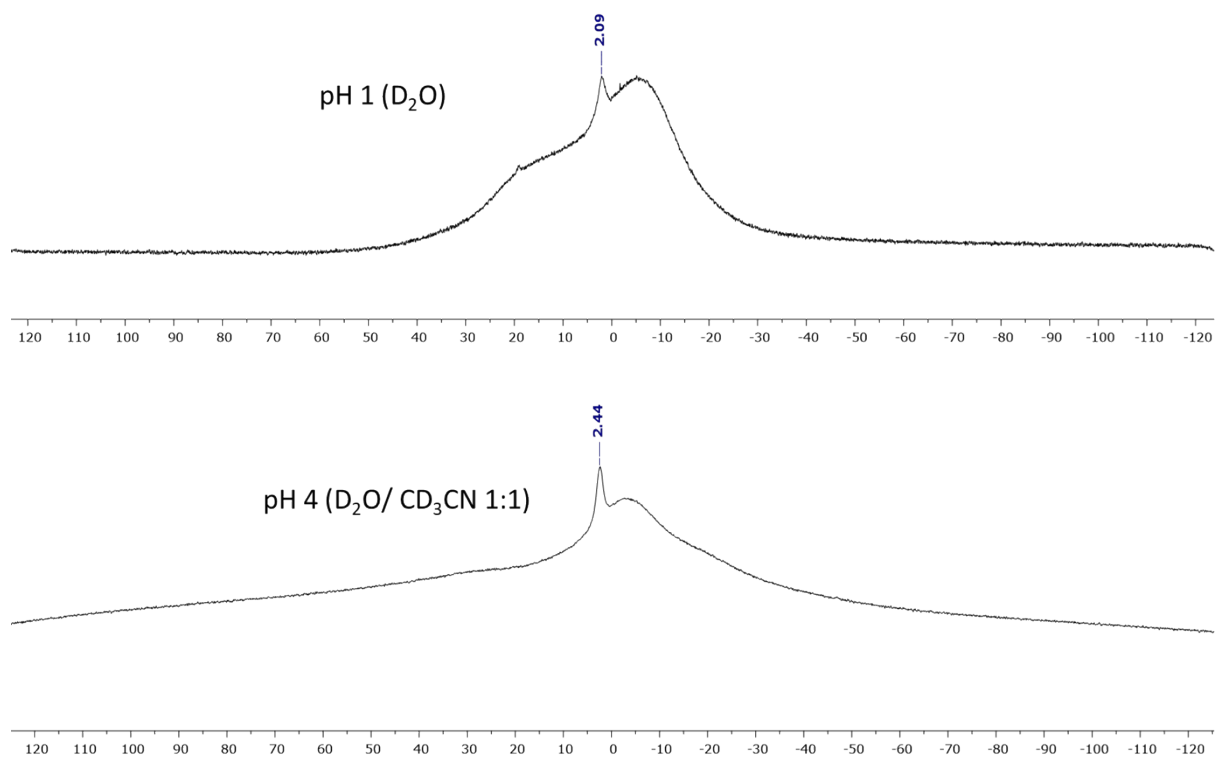

Figure S5 -  $^{13}\text{C}$  (JMod) NMR (125.79 MHz) of  $\text{H}_2\text{Do2py2BF}_3$  at pH 4 ( $\text{D}_2\text{O}/\text{CD}_3\text{CN}$  1:1)

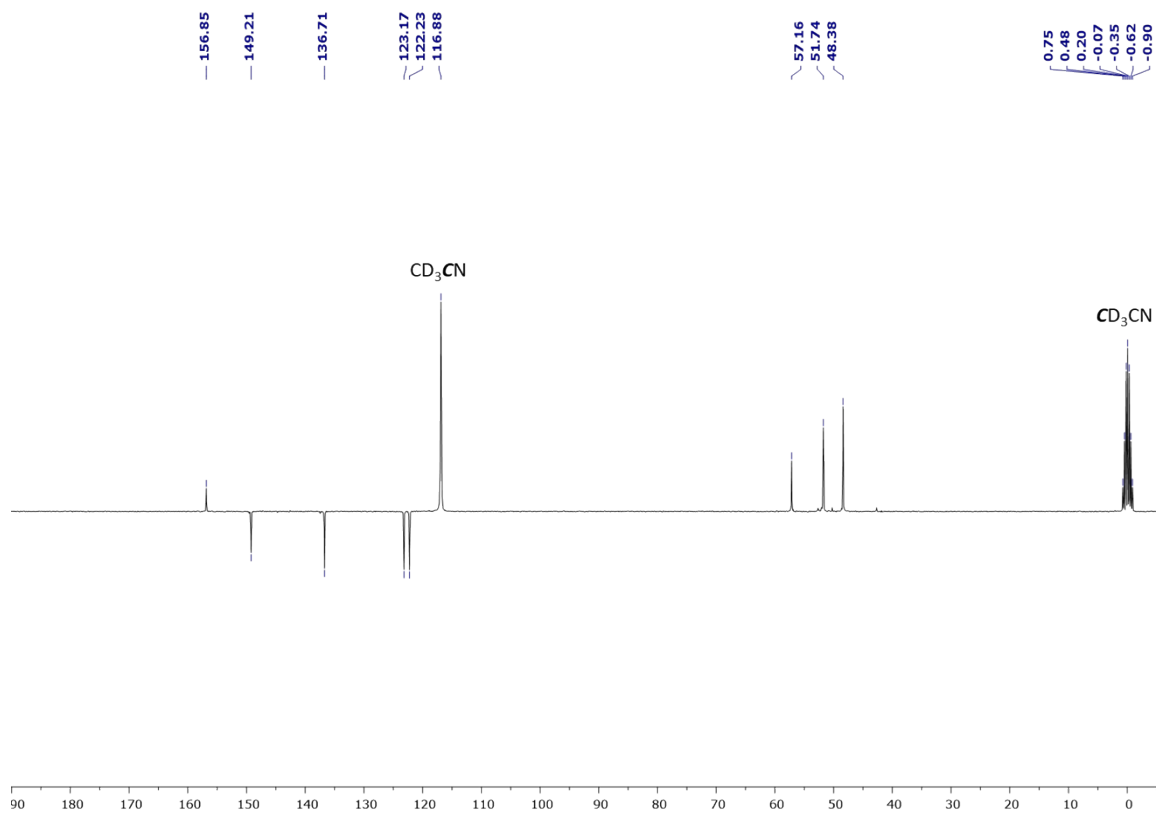

Figure S6 -  $^{11}\text{B}$ - $^1\text{H}$  HMBC NMR of  $\text{H}_2\text{Do2py2BF}_3$

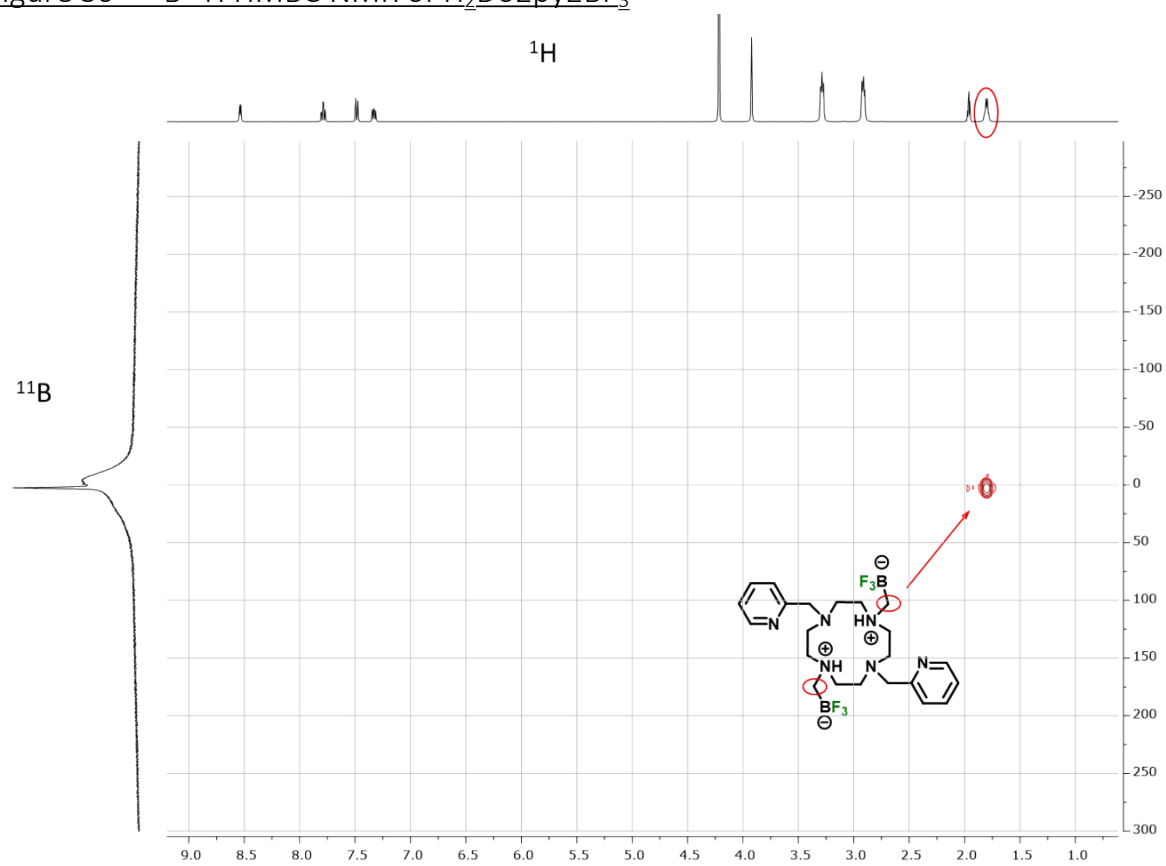

Figure S7 - COSY NMR of  $\text{H}_2\text{Do2py2BF}_3$

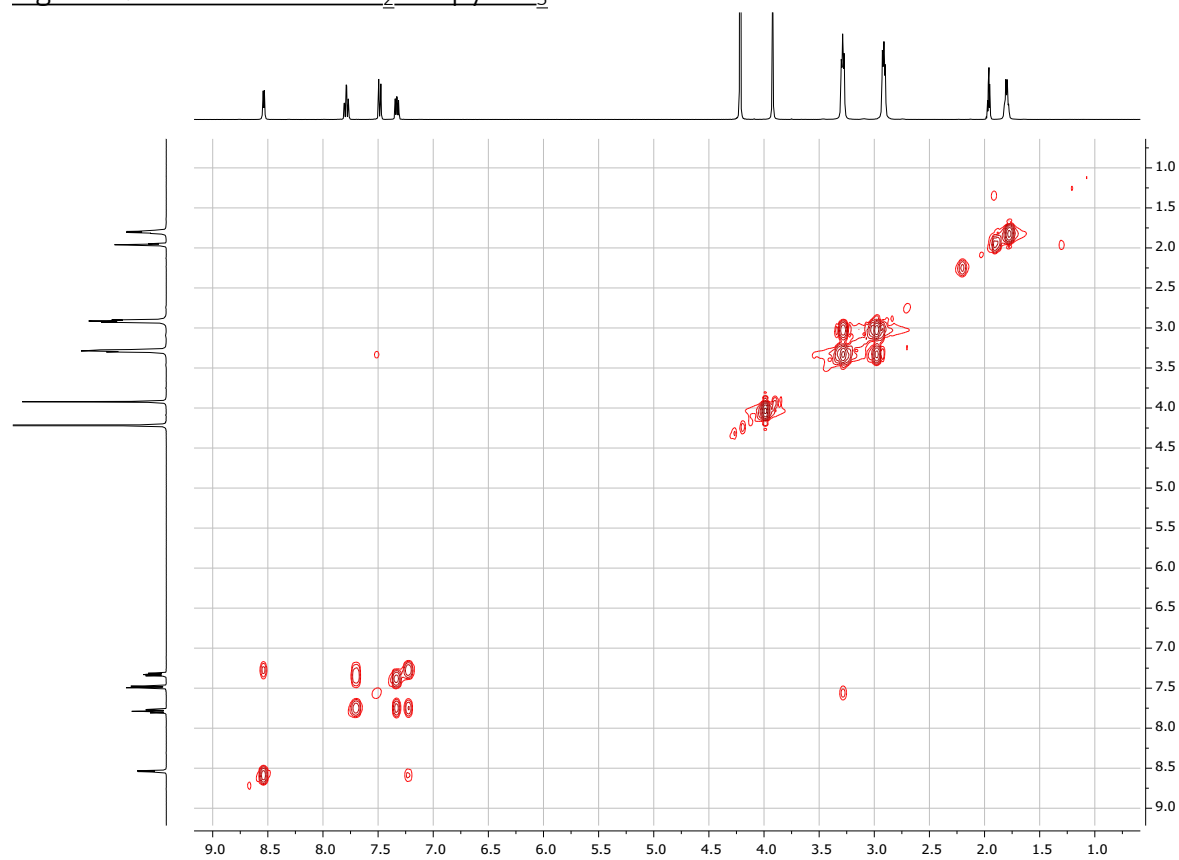



Figure S8 –  $^{13}\text{C}$ - $^1\text{H}$  HSQC NMR of  $\text{H}_2\text{Do2py2BF}_3$

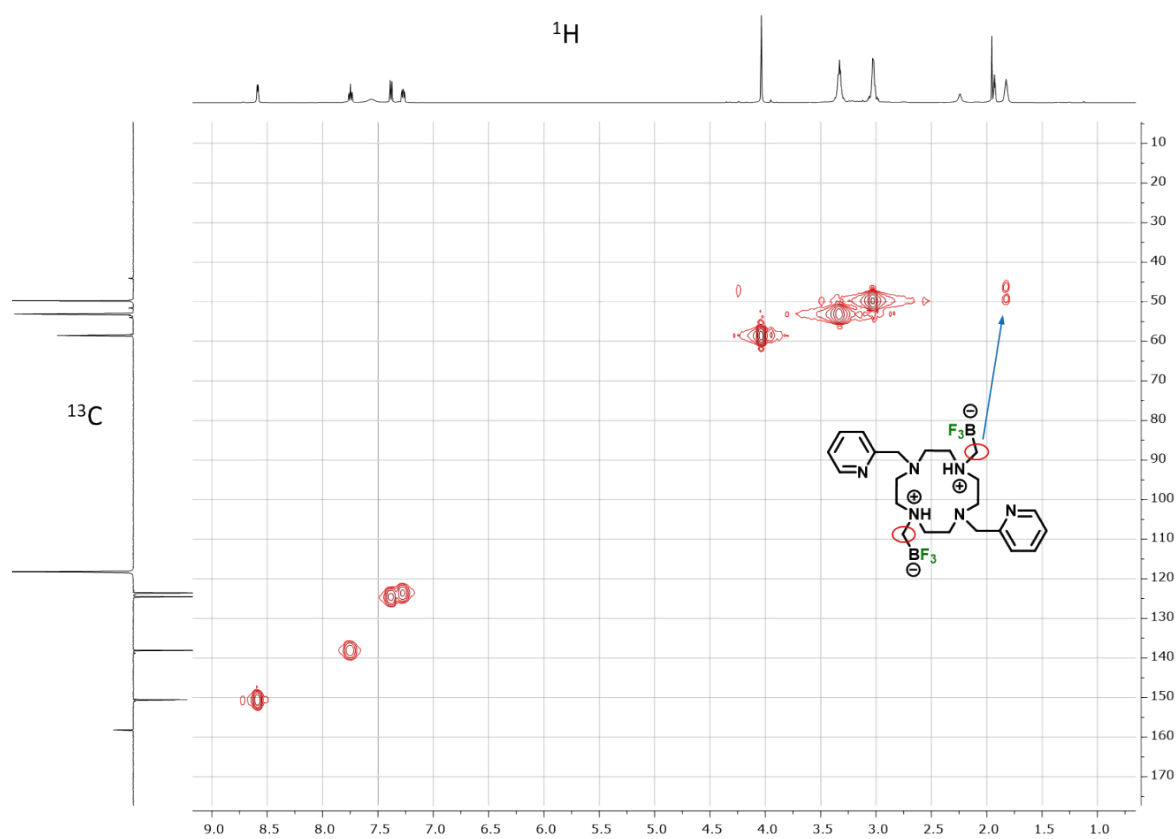

Figure S9 - ESI-HRMS (Positive ions) of H<sub>2</sub>Do2py2BF<sub>3</sub>

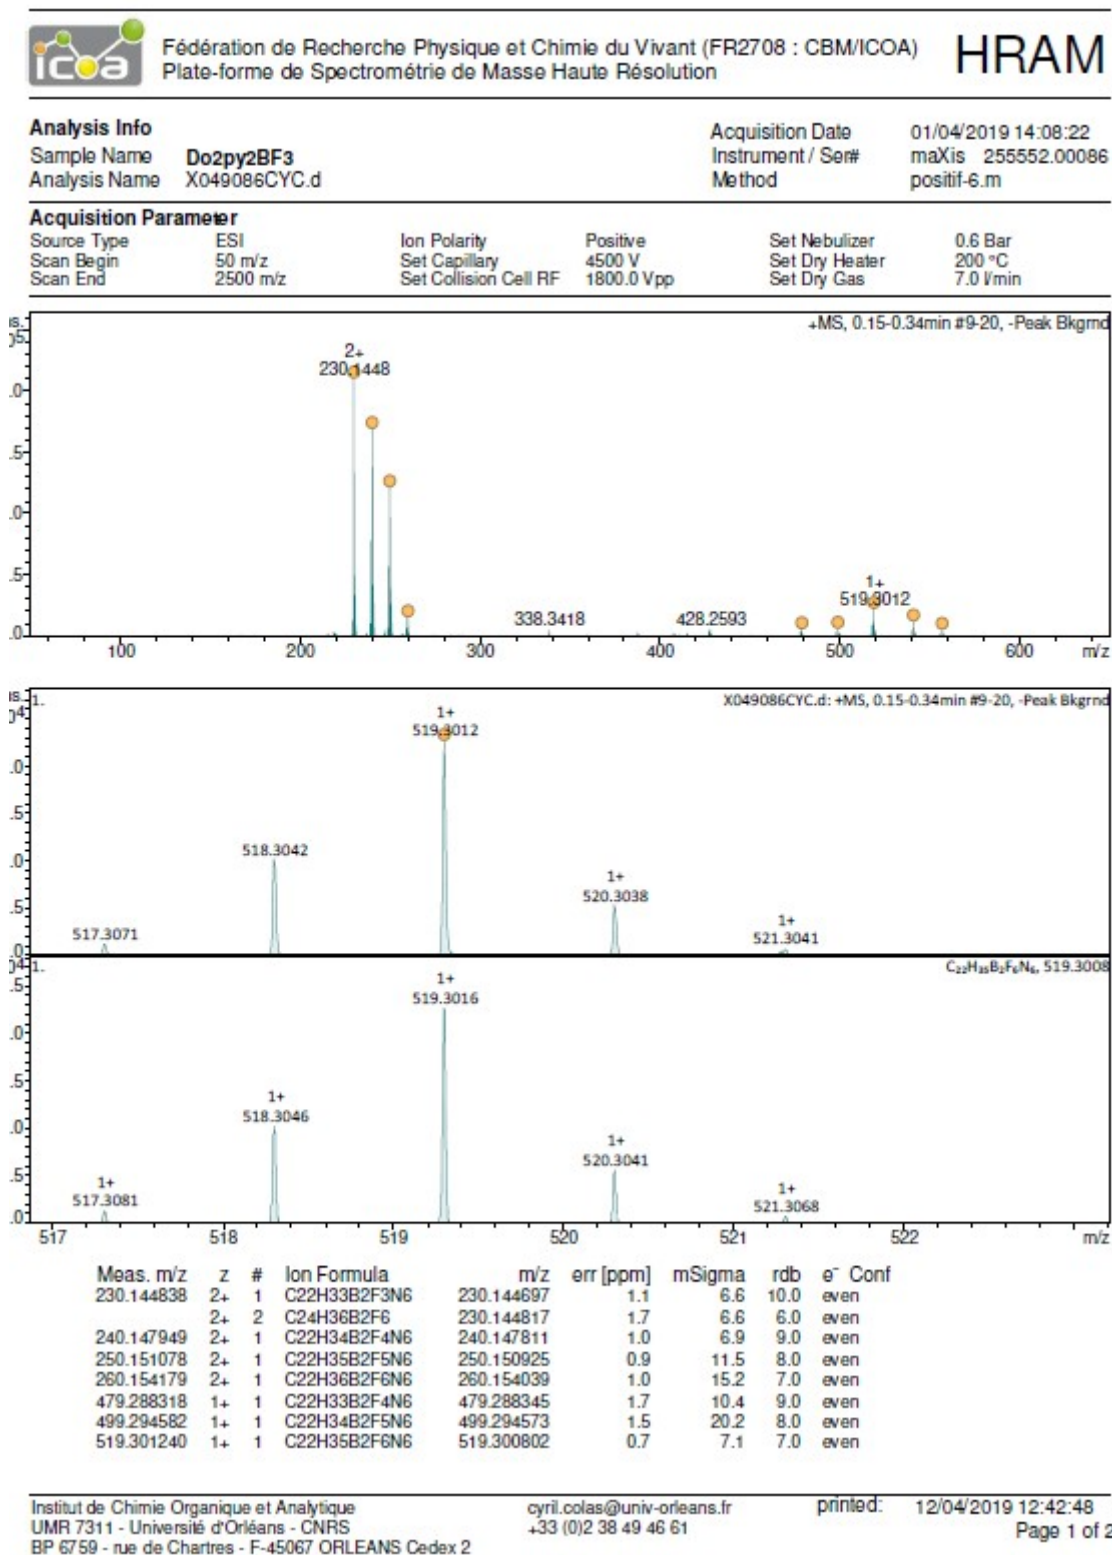

Figure S10 - ESI-HRMS (Negative ions) of H<sub>2</sub>Do2py2BF<sub>3</sub>

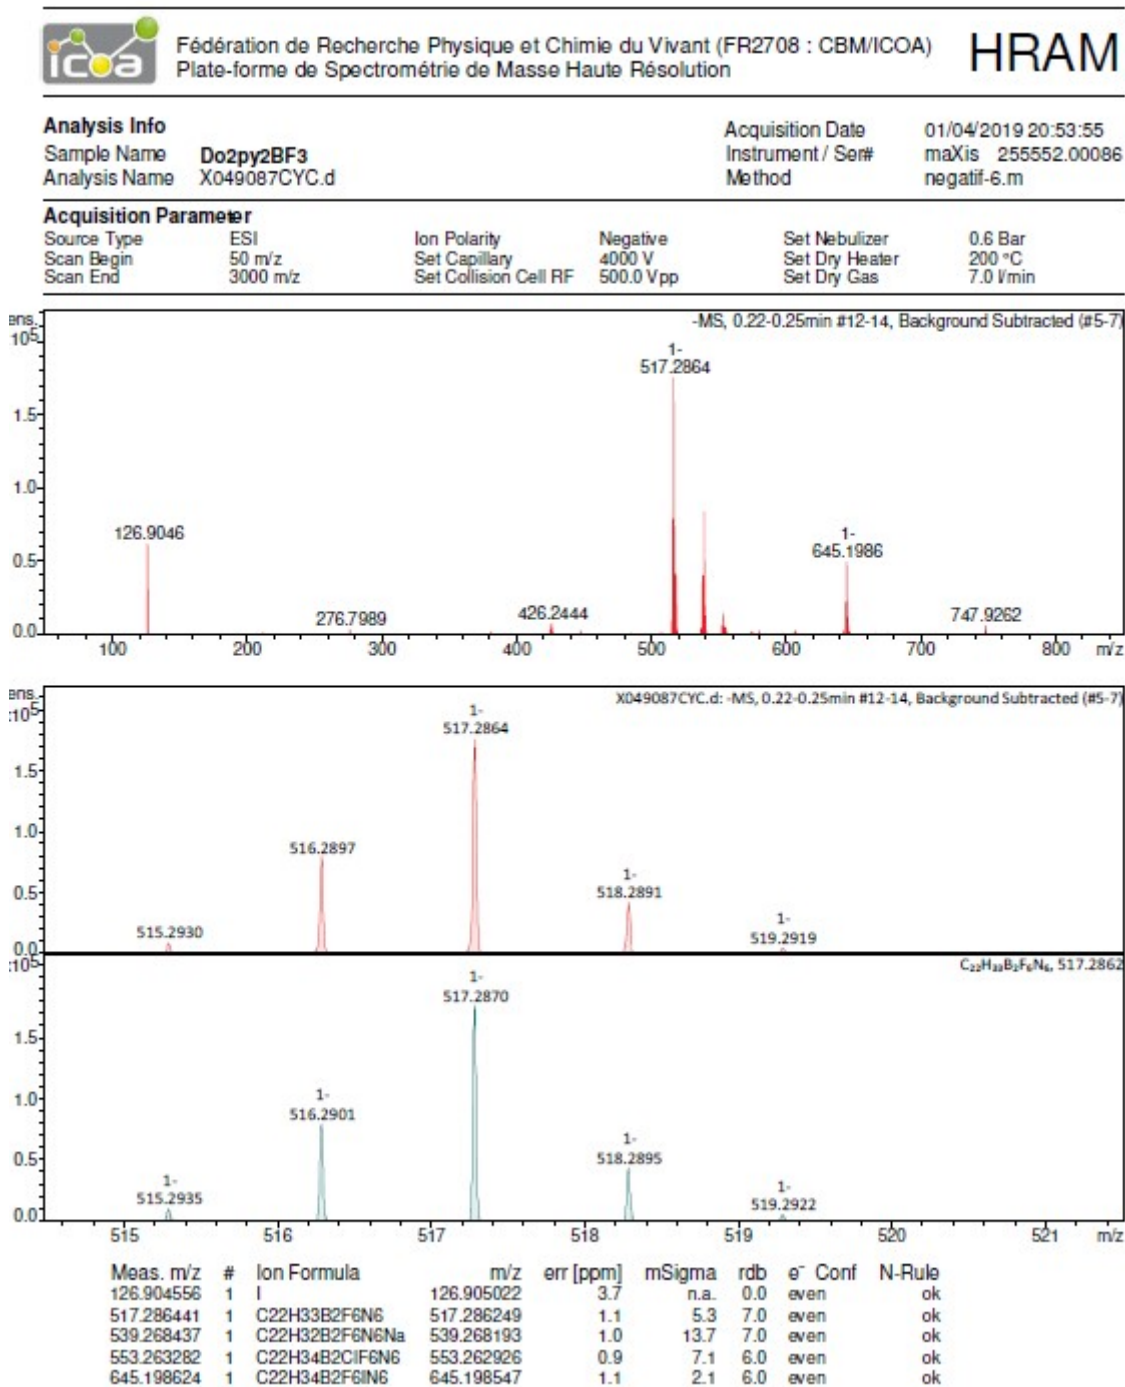

## Synthesis and characterization of Zn(Do2py2BF<sub>3</sub>)

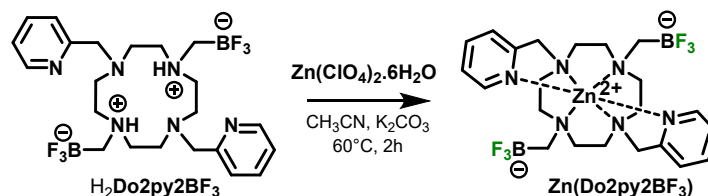

*Warning: perchlorate salts can be explosive, and were therefore used in small quantities (< 100 mg) under their hydrated form.*

H<sub>2</sub>Do2py2BF<sub>3</sub> (0.091 g, 0.176 mmol) was placed in dry acetonitrile (7 mL) with potassium carbonate (0.122 g, 5 equiv.) and zinc(II) perchlorate hexahydrate (0.0655 g, 0.176 mmol). The mixture was stirred at 60°C for 2 hours, then filtered to remove excess potassium carbonate. 3 mL of water were added to the supernatant and the solution was slowly evaporated to afford colorless crystals of the title compound (0.077 g, 0.132 mmol, yield = 75%).

### Zn(Do2py2BF<sub>3</sub>):

*Nb: <sup>1</sup>H NMR presents broad signals at Room Temperature, therefore spectrum integration was performed at 333K. <sup>11</sup>B and <sup>13</sup>C remain broad even at 333K and did not lead to satisfactory spectra.*

*<sup>1</sup>H NMR (D<sub>2</sub>O/CD<sub>3</sub>CN 1:1, 500.13 MHz, 298 K, TMS) δ (ppm): 8.42 (d, 2H, J<sub>H-H</sub> = 5.1 Hz CH<sub>Ar</sub>), 7.98 (dt, 2H, J<sub>H-H</sub> = 7.6 and 1.5 Hz, CH<sub>Ar</sub>), 7.50 (d, 2H, J<sub>H-H</sub> = 7.6 Hz, CH<sub>Ar</sub>), 7.33 (dd, 2H, J<sub>H-H</sub> = 7.6 and 5.1 Hz, CH<sub>Ar</sub>), 4.20 (br, 4H, CH<sub>2</sub>Py), 3.15-2.60 (m, 16H, CH<sub>2</sub><sup>cyclen</sup>), 1.13 (br, 4H, <sup>3</sup>J<sub>H-F</sub> = 5.2 Hz, CH<sub>2</sub>BF<sub>3</sub>).*

*<sup>19</sup>F NMR (D<sub>2</sub>O/CD<sub>3</sub>CN 1:1, 470.59 MHz, 298 K, CFCl<sub>3</sub>) δ (ppm): -137.4 (s).*

*ESI-HR-MS (positive ions, M = Zn(Do2py2BF<sub>3</sub>)):*

*m/z calcd. for [C<sub>22</sub>H<sub>33</sub>B<sub>2</sub>F<sub>5</sub>N<sub>6</sub>Zn]<sup>+</sup>: 561.2080, found [M-F]<sup>+</sup>: 561.2082.*

*m/z calcd. for [C<sub>22</sub>H<sub>33</sub>B<sub>2</sub>F<sub>6</sub>N<sub>6</sub>Zn]<sup>+</sup>: 581.2142, found [M+H]<sup>+</sup>: 581.2144.*

*m/z calcd. for [C<sub>22</sub>H<sub>32</sub>B<sub>2</sub>F<sub>6</sub>N<sub>6</sub>NaZn]<sup>+</sup>: 603.1962, found [M+Na]<sup>+</sup>: 603.1963.*

*m/z calcd. for [C<sub>22</sub>H<sub>32</sub>B<sub>2</sub>F<sub>6</sub>KN<sub>6</sub>Zn]<sup>+</sup>: 619.1701, found [M+K]<sup>+</sup>: 619.1708.*

*additional fragmentations found: [MH<sub>2</sub>-HF]<sup>2+</sup>: m/z 250.1510, [MH<sub>2</sub>-2HF]<sup>2+</sup>: m/z 240.1479.*

*Elemental analysis:*

*calcd (%) for C<sub>22</sub>H<sub>32</sub>B<sub>2</sub>F<sub>6</sub>N<sub>6</sub>Zn: C 45.44, H 5.55, N 14.45; found: C 45.27, H 5.49, N 15.38*

Figure S11 -  $^1\text{H}$  NMR (400.16 MHz,  $\text{D}_2\text{O}/\text{CD}_3\text{CN}$  1 :1) of  $\text{Zn}(\text{Do2py2BF}_3)$  at 298K and 333K

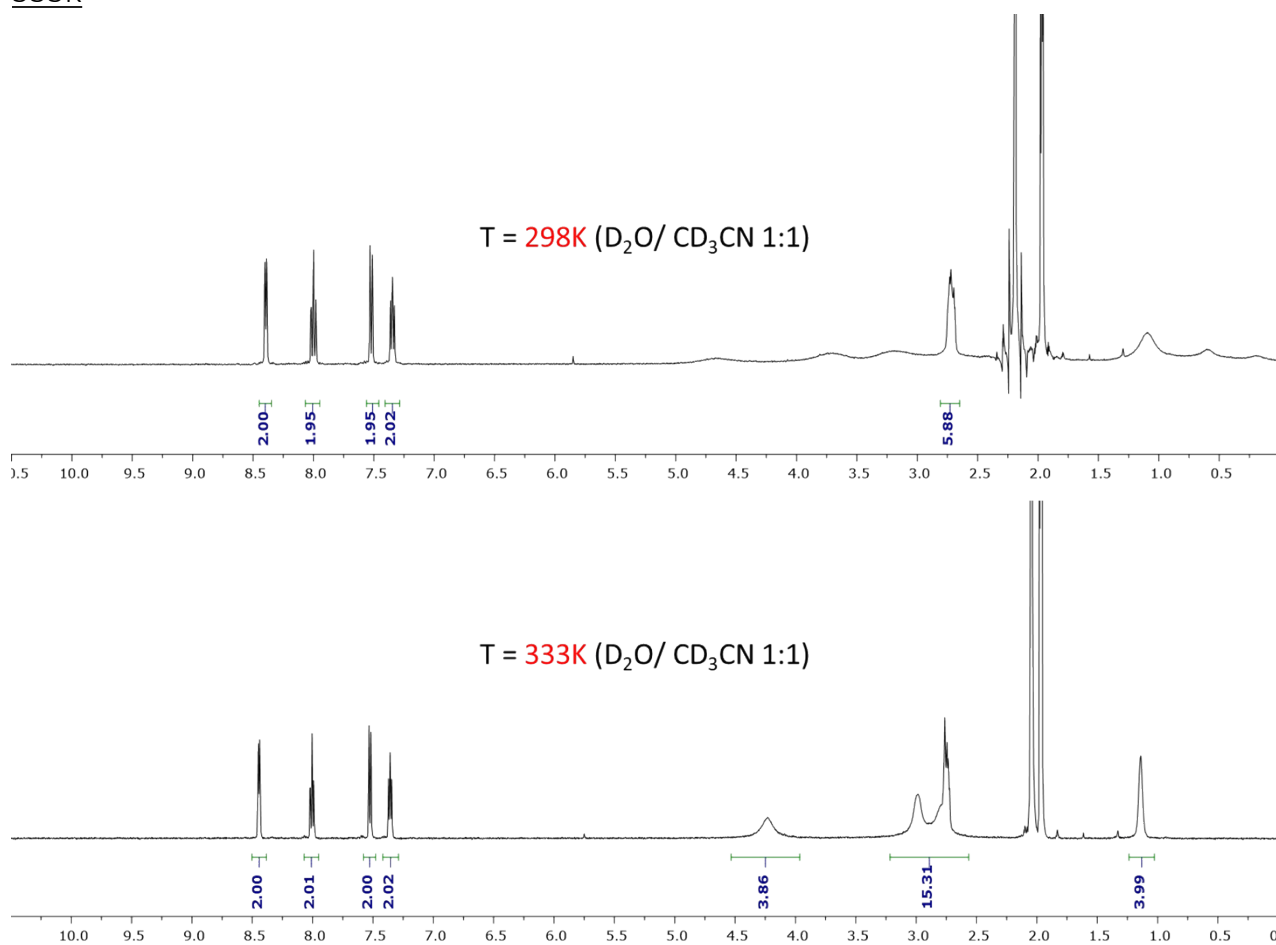

Figure S12 -  $^{19}\text{F}$  NMR (376.53 MHz,  $\text{D}_2\text{O}/\text{CD}_3\text{CN}$  1 :1) of  $\text{Zn}(\text{Do}2\text{py}2\text{BF}_3)$  at 298K

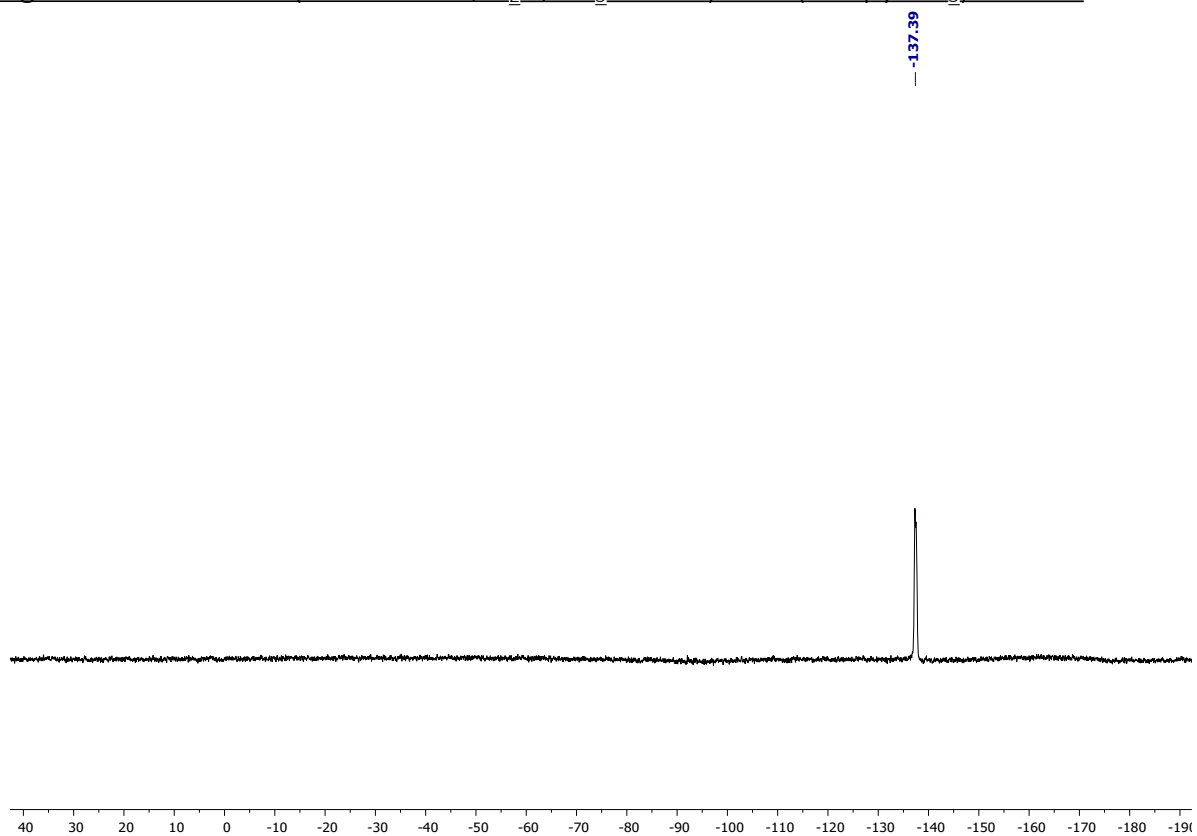

Figure S13 – X-Ray diffraction structure of Zn(Do2py2BF<sub>3</sub>) with calculated N1-N2-N3-N4 centroid and Zn-N distances

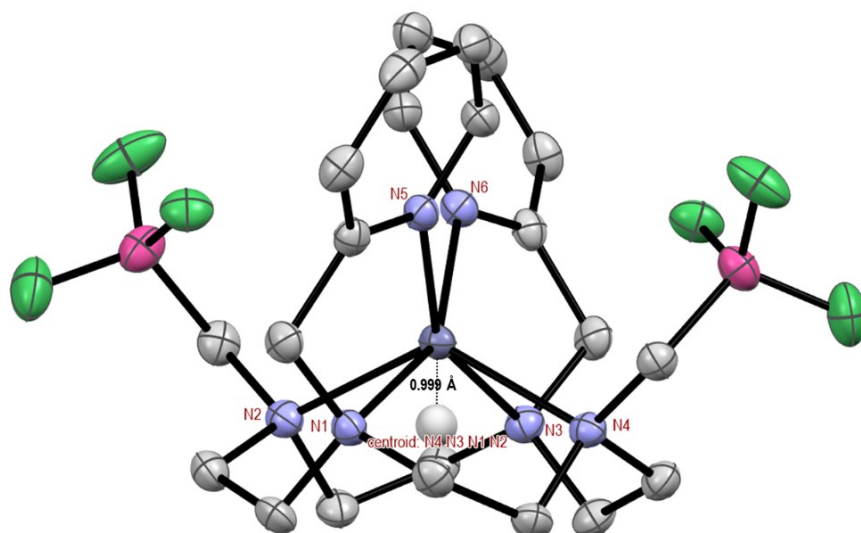

|                  | Zn(Do2py2BF <sub>3</sub> ) | Zn(Do2py) <sub>2</sub> <sup>2+</sup><br>(ref 2) |
|------------------|----------------------------|-------------------------------------------------|
| <b>Zn-N1</b>     | 2.221                      | 2.141                                           |
| <b>Zn-N2</b>     | 2.322                      | 2.293                                           |
| <b>Zn-N3</b>     | 2.244                      | 2.172                                           |
| <b>Zn-N4</b>     | 2.331                      | 2.298                                           |
| <b>Zn-N5(py)</b> | 2.182                      | 2.186                                           |
| <b>Zn-N6(py)</b> | 2.17                       | 2.165                                           |

Bond distances (Å). Values for Zn(Do2py)<sub>2</sub><sup>2+</sup> from Bernier et. al [2]

Figure S14 - ESI-HRMS (Positive ions) of Zn(Do2py2BF<sub>3</sub>)

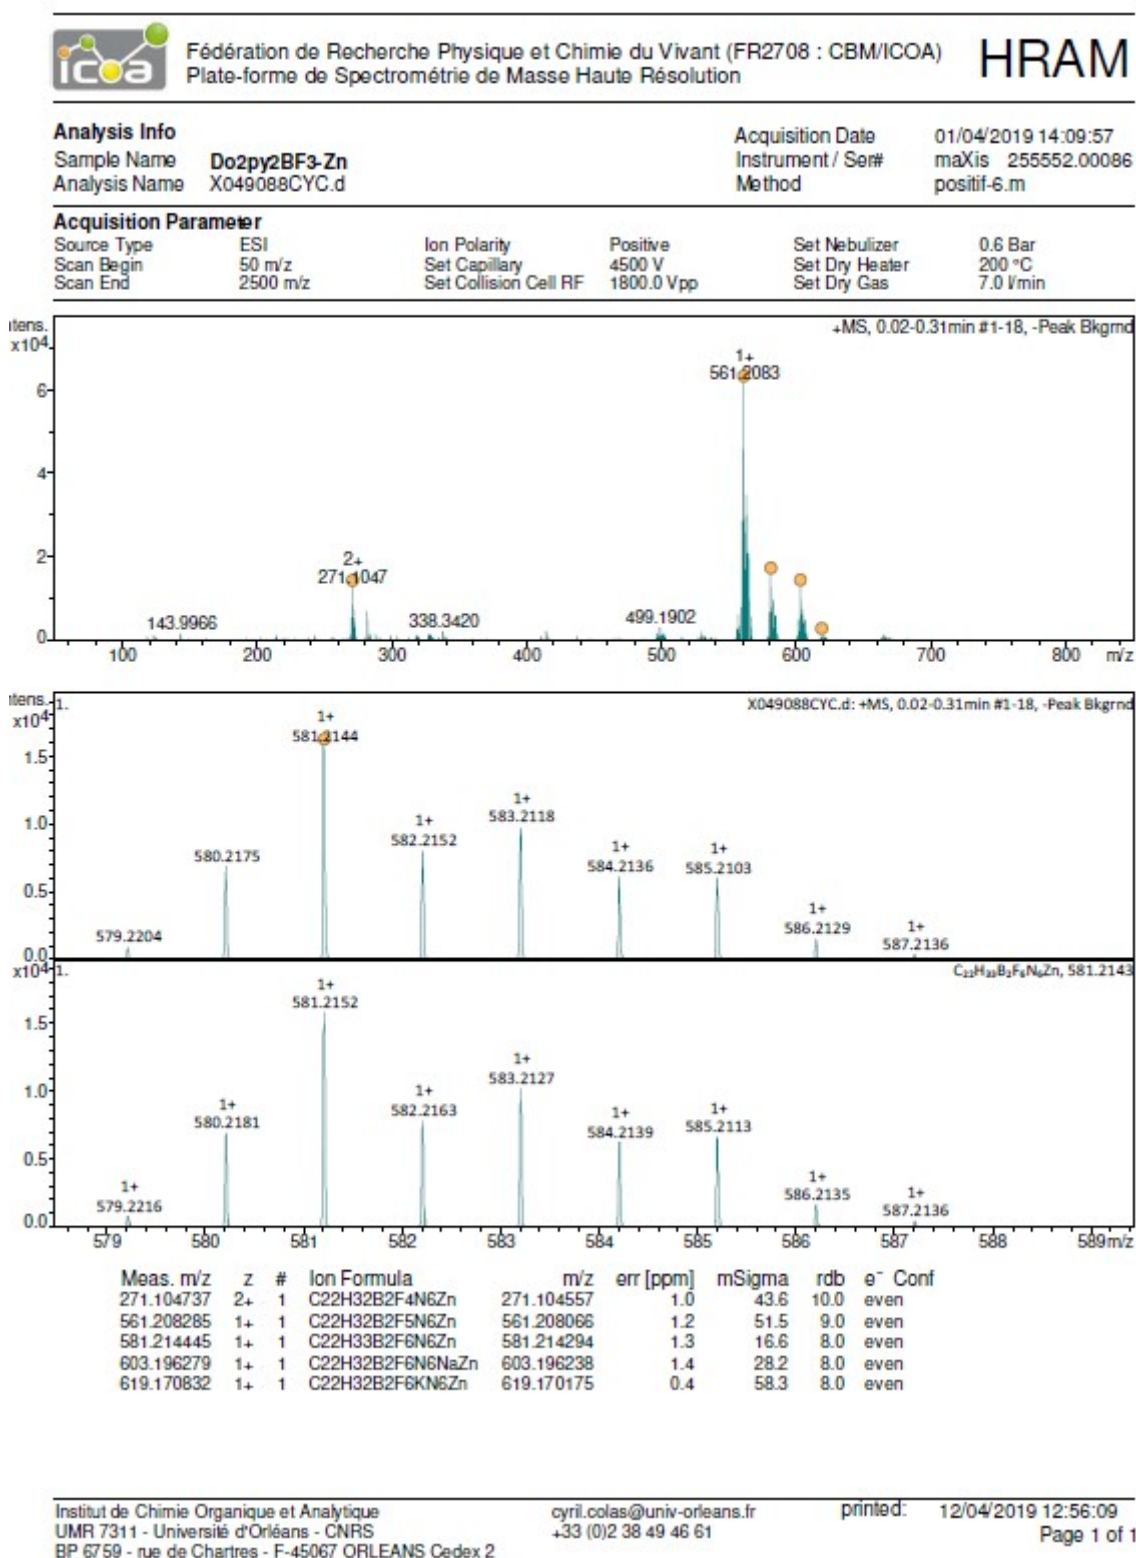



## X-Ray diffraction data:

H<sub>2</sub>Do2py2BF<sub>3</sub> (pH 4)

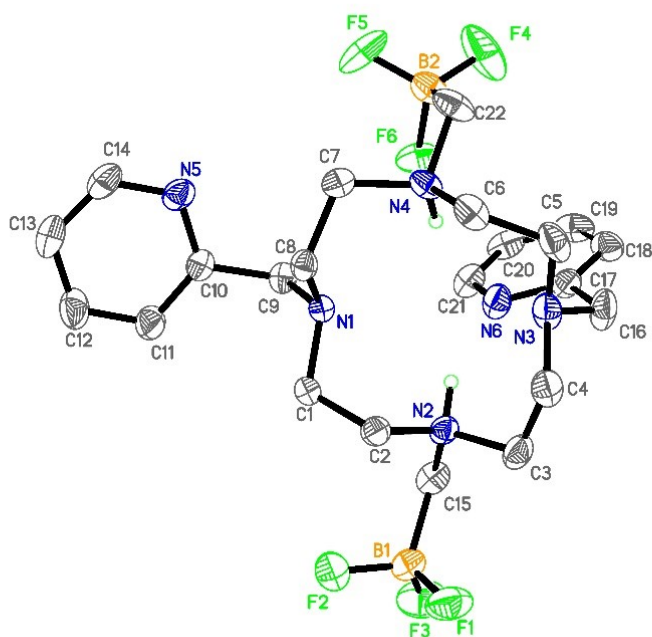

molecule

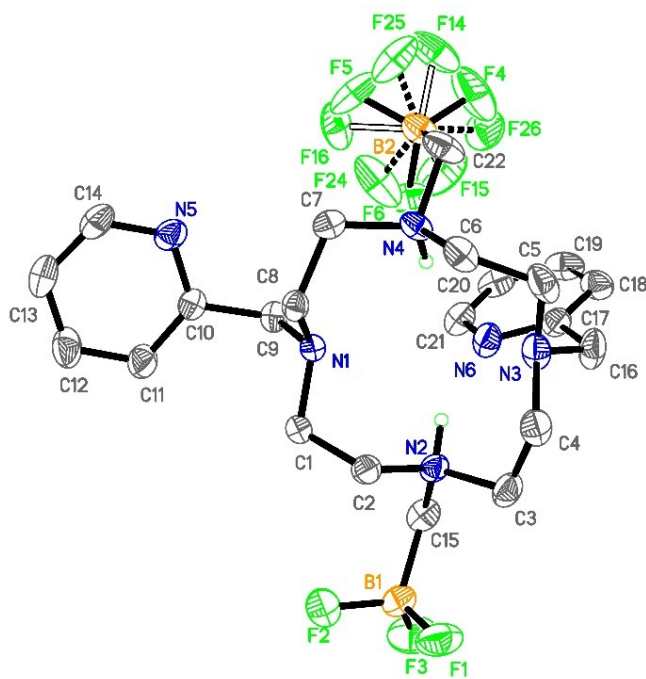

asymmetric unit

Table S1 - Crystal data and structure refinement for H<sub>2</sub>Do2py2BF<sub>3</sub> (pH 4)

|                                   |                                                                              |                  |
|-----------------------------------|------------------------------------------------------------------------------|------------------|
| Identification code               | H <sub>2</sub> Do2py2BF <sub>3</sub>                                         |                  |
| Empirical formula                 | C <sub>22</sub> H <sub>34</sub> B <sub>2</sub> F <sub>6</sub> N <sub>6</sub> |                  |
| Formula weight                    | 518.17                                                                       |                  |
| Temperature                       | 193(2) K                                                                     |                  |
| Wavelength                        | 0.71073 Å                                                                    |                  |
| Crystal system                    | Monoclinic                                                                   |                  |
| Space group                       | <i>P</i> 2 <sub>1</sub> / <i>c</i>                                           |                  |
| Unit cell dimensions              | a = 11.5578(8) Å                                                             | α = 90°.         |
|                                   | b = 15.0808(10) Å                                                            | β = 109.789(2)°. |
|                                   | c = 15.1865(8) Å                                                             | γ = 90°.         |
| Volume                            | 2490.7(3) Å <sup>3</sup>                                                     |                  |
| Z                                 | 4                                                                            |                  |
| Density (calculated)              | 1.382 Mg/m <sup>3</sup>                                                      |                  |
| Absorption coefficient            | 0.115 mm <sup>-1</sup>                                                       |                  |
| F(000)                            | 1088                                                                         |                  |
| Crystal size                      | 0.700 x 0.200 x 0.160 mm <sup>3</sup>                                        |                  |
| Theta range for data collection   | 3.029 to 28.754°.                                                            |                  |
| Index ranges                      | -15 ≤ h ≤ 15, -20 ≤ k ≤ 20, -20 ≤ l ≤ 17                                     |                  |
| Reflections collected             | 108499                                                                       |                  |
| Independent reflections           | 6459 [R(int) = 0.0492]                                                       |                  |
| Completeness to theta = 25.242°   | 99.8 %                                                                       |                  |
| Absorption correction             | Semi-empirical from equivalents                                              |                  |
| Max. and min. transmission        | 0.7458 and 0.6753                                                            |                  |
| Refinement method                 | Full-matrix least-squares on F <sup>2</sup>                                  |                  |
| Data / restraints / parameters    | 6459 / 126 / 387                                                             |                  |
| Goodness-of-fit on F <sup>2</sup> | 1.011                                                                        |                  |
| Final R indices [I > 2σ(I)]       | R1 = 0.0511, wR2 = 0.1152                                                    |                  |
| R indices (all data)              | R1 = 0.0752, wR2 = 0.1321                                                    |                  |
| Extinction coefficient            | n/a                                                                          |                  |
| Largest diff. peak and hole       | 0.399 and -0.333 e.Å <sup>-3</sup>                                           |                  |

$\text{H}_4\text{Do}2\text{py}2\text{BF}_3^{2+}$  (pH 1)

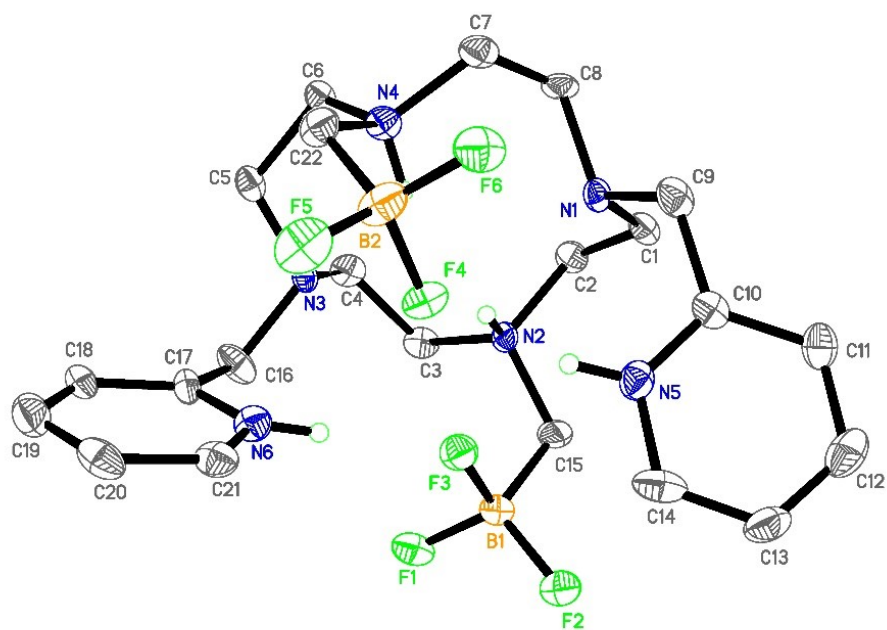

cationic part of the structure

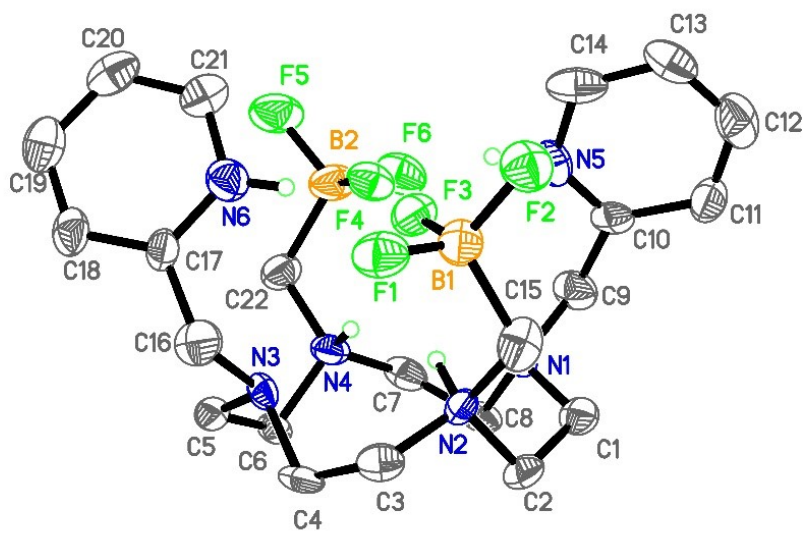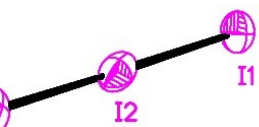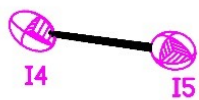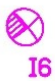

asymmetric unit

Table S2 - Crystal data and structure refinement for H<sub>4</sub>Do2py2BF<sub>3</sub><sup>2+</sup> (pH 1)

|                                   |                                                                                               |                 |
|-----------------------------------|-----------------------------------------------------------------------------------------------|-----------------|
| Identification code               | H <sub>4</sub> Do2py2BF <sub>3</sub> <sup>2+</sup>                                            |                 |
| Empirical formula                 | C <sub>22</sub> H <sub>36</sub> B <sub>2</sub> F <sub>6</sub> N <sub>6</sub> , I <sub>6</sub> |                 |
| Formula weight                    | 1281.59                                                                                       |                 |
| Temperature                       | 193(2) K                                                                                      |                 |
| Wavelength                        | 1.54178 Å                                                                                     |                 |
| Crystal system                    | Triclinic                                                                                     |                 |
| Space group                       | <i>P</i> $\bar{1}$                                                                            |                 |
| Unit cell dimensions              | a = 12.8808(5) Å                                                                              | α = 75.784(3)°. |
|                                   | b = 12.9692(5) Å                                                                              | β = 67.305(3)°. |
|                                   | c = 13.6306(5) Å                                                                              | γ = 60.961(3)°. |
| Volume                            | 1831.86(13) Å <sup>3</sup>                                                                    |                 |
| Z                                 | 2                                                                                             |                 |
| Density (calculated)              | 2.323 Mg/m <sup>3</sup>                                                                       |                 |
| Absorption coefficient            | 40.430 mm <sup>-1</sup>                                                                       |                 |
| F(000)                            | 1184                                                                                          |                 |
| Crystal size                      | 0.060 x 0.050 x 0.020 mm <sup>3</sup>                                                         |                 |
| Theta range for data collection   | 3.524 to 66.770°.                                                                             |                 |
| Index ranges                      | -15 ≤ h ≤ 15, -15 ≤ k ≤ 15, -10 ≤ l ≤ 16                                                      |                 |
| Reflections collected             | 6486                                                                                          |                 |
| Independent reflections           | 6486 [R(int) = ?]                                                                             |                 |
| Completeness to theta = 66.770°   | 99.6 %                                                                                        |                 |
| Absorption correction             | Semi-empirical from equivalents                                                               |                 |
| Max. and min. transmission        | 0.7528 and 0.3939                                                                             |                 |
| Refinement method                 | Full-matrix least-squares on F <sup>2</sup>                                                   |                 |
| Data / restraints / parameters    | 6486 / 1 / 392                                                                                |                 |
| Goodness-of-fit on F <sup>2</sup> | 1.002                                                                                         |                 |
| Final R indices [I > 2σ(I)]       | R1 = 0.0541, wR2 = 0.1187                                                                     |                 |
| R indices (all data)              | R1 = 0.0984, wR2 = 0.1381                                                                     |                 |
| Extinction coefficient            | n/a                                                                                           |                 |
| Largest diff. peak and hole       | 1.491 and -1.315 e.Å <sup>-3</sup>                                                            |                 |

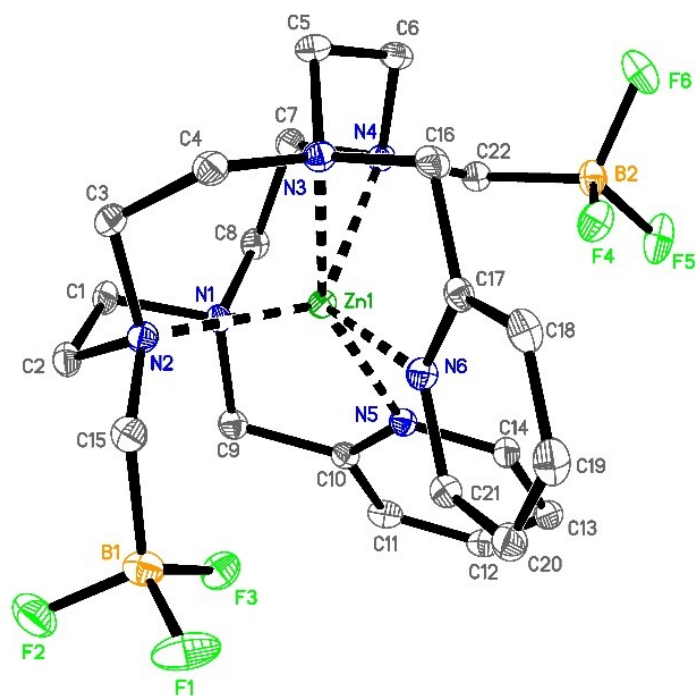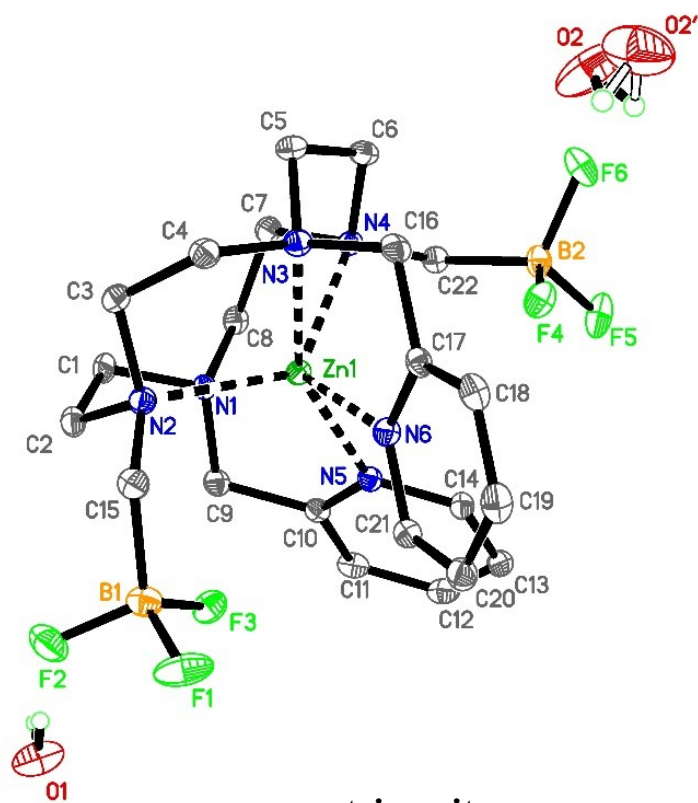

asymmetric unit

Table S3 - Crystal data and structure refinement for Zn(Do2py2BF<sub>3</sub>)

|                                   |                                                                                                      |          |
|-----------------------------------|------------------------------------------------------------------------------------------------------|----------|
| Identification code               | Zn(Do2py2BF <sub>3</sub> )                                                                           |          |
| Empirical formula                 | C <sub>22</sub> H <sub>32</sub> B <sub>2</sub> F <sub>6</sub> N <sub>6</sub> Zn, 2 H <sub>2</sub> O, |          |
| Formula weight                    | 617.56                                                                                               |          |
| Temperature                       | 193(2) K                                                                                             |          |
| Wavelength                        | 0.71073 Å                                                                                            |          |
| Crystal system                    | Orthorhombic                                                                                         |          |
| Space group                       | <i>Pca</i> 2 <sub>1</sub>                                                                            |          |
| Unit cell dimensions              | a = 17.1147(8) Å                                                                                     | α = 90°. |
|                                   | b = 9.0627(5) Å                                                                                      | β = 90°. |
|                                   | c = 16.9949(8) Å                                                                                     | γ = 90°. |
| Volume                            | 2636.0(2) Å <sup>3</sup>                                                                             |          |
| Z                                 | 4                                                                                                    |          |
| Density (calculated)              | 1.556 Mg/m <sup>3</sup>                                                                              |          |
| Absorption coefficient            | 1.008 mm <sup>-1</sup>                                                                               |          |
| F(000)                            | 1280                                                                                                 |          |
| Crystal size                      | 0.250 x 0.200 x 0.050 mm <sup>3</sup>                                                                |          |
| Theta range for data collection   | 3.274 to 28.310°.                                                                                    |          |
| Index ranges                      | -22 ≤ h ≤ 22, -12 ≤ k ≤ 12, -19 ≤ l ≤ 22                                                             |          |
| Reflections collected             | 64889                                                                                                |          |
| Independent reflections           | 6090 [R(int) = 0.0376]                                                                               |          |
| Completeness to theta = 25.242°   | 99.8 %                                                                                               |          |
| Absorption correction             | Semi-empirical from equivalents                                                                      |          |
| Max. and min. transmission        | 0.7457 and 0.6317                                                                                    |          |
| Refinement method                 | Full-matrix least-squares on F <sup>2</sup>                                                          |          |
| Data / restraints / parameters    | 6090 / 7 / 376                                                                                       |          |
| Goodness-of-fit on F <sup>2</sup> | 1.047                                                                                                |          |
| Final R indices [I > 2σ(I)]       | R1 = 0.0239, wR2 = 0.0499                                                                            |          |
| R indices (all data)              | R1 = 0.0303, wR2 = 0.0521                                                                            |          |
| Absolute structure parameter      | 0.006(3)                                                                                             |          |
| Extinction coefficient            | n/a                                                                                                  |          |
| Largest diff. peak and hole       | 0.224 and -0.319 e.Å <sup>-3</sup>                                                                   |          |

## NMR monitoring of Do2py2BF<sub>3</sub> and Zn(Do2py2BF<sub>3</sub>) pH-dependant stability

3 pH conditions were used to assess stability of **Do2py2BF<sub>3</sub>** ligand and **Zn(Do2py2BF<sub>3</sub>)**, at concentrations of ca.  $3 \cdot 10^{-2}$  M in aqueous buffered solution with addition of DMSO to ensure full solubility of studied molecules as well as eventual degradation products. Monitoring was carried out by <sup>19</sup>F NMR with a minimum of 6 timepoints between. Trifluoroacetic acid (TFA) in solution in water was added in NMR tubes in a sealed capillary tube as an internal reference.

- Acidic pH ( $2 \pm 0.2$ ): HCl in H<sub>2</sub>O (0.5 mL) + DMSO (0.4 mL).
- Neutral pH ( $7.3 \pm 0.2$ ): Acetate buffer (0.5 mL) + DMSO (0.4 mL).
- Basic pH ( $9.7 \pm 0.2$ ): Ammonia buffer (0.5 mL) + DMSO (0.4 mL).

Figure S15: H<sub>2</sub>Do2py2BF<sub>3</sub> ligand (pH 2, 25°C)

*Nb: at acidic pH, ligand is under the form H<sub>4</sub>Do2py2BF<sub>3</sub><sup>2+</sup>, with three broad <sup>19</sup>F signals (vide supra). Signals are slightly shifted owing to the different solvent system (D<sub>2</sub>O/DMSO vs. D<sub>2</sub>O only) but confirms the multiplicity and shape of the signals corresponding to the intact ligand from control spectrum.*

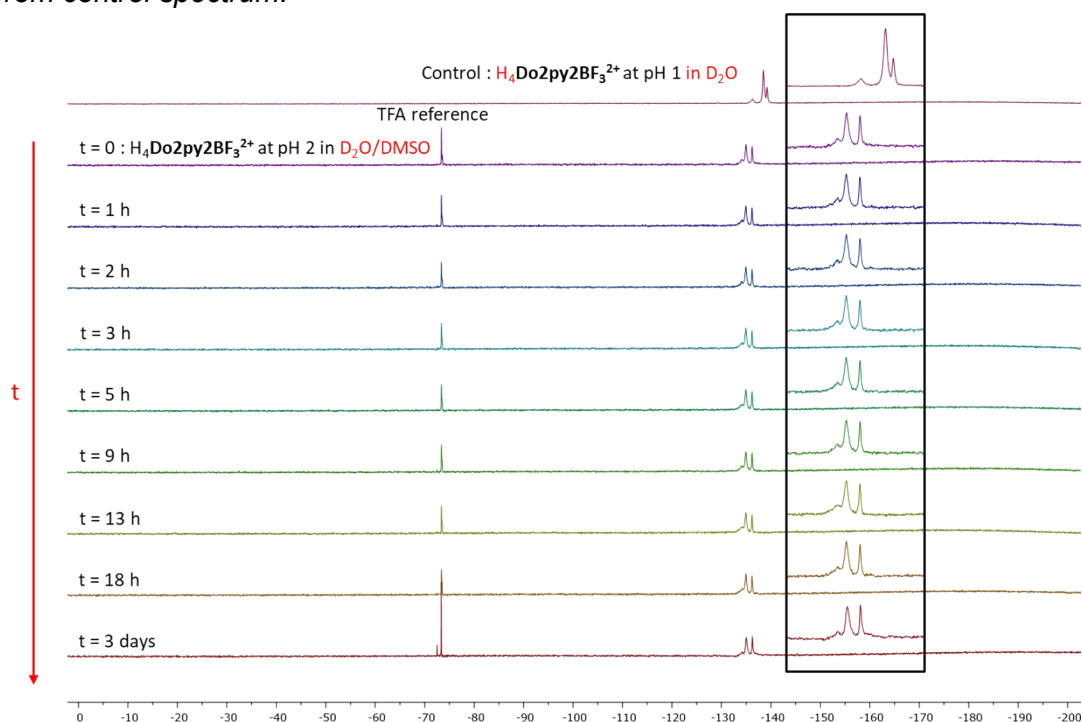



Figure S16: H<sub>2</sub>Do2py2BF<sub>3</sub> ligand (pH 7.3)

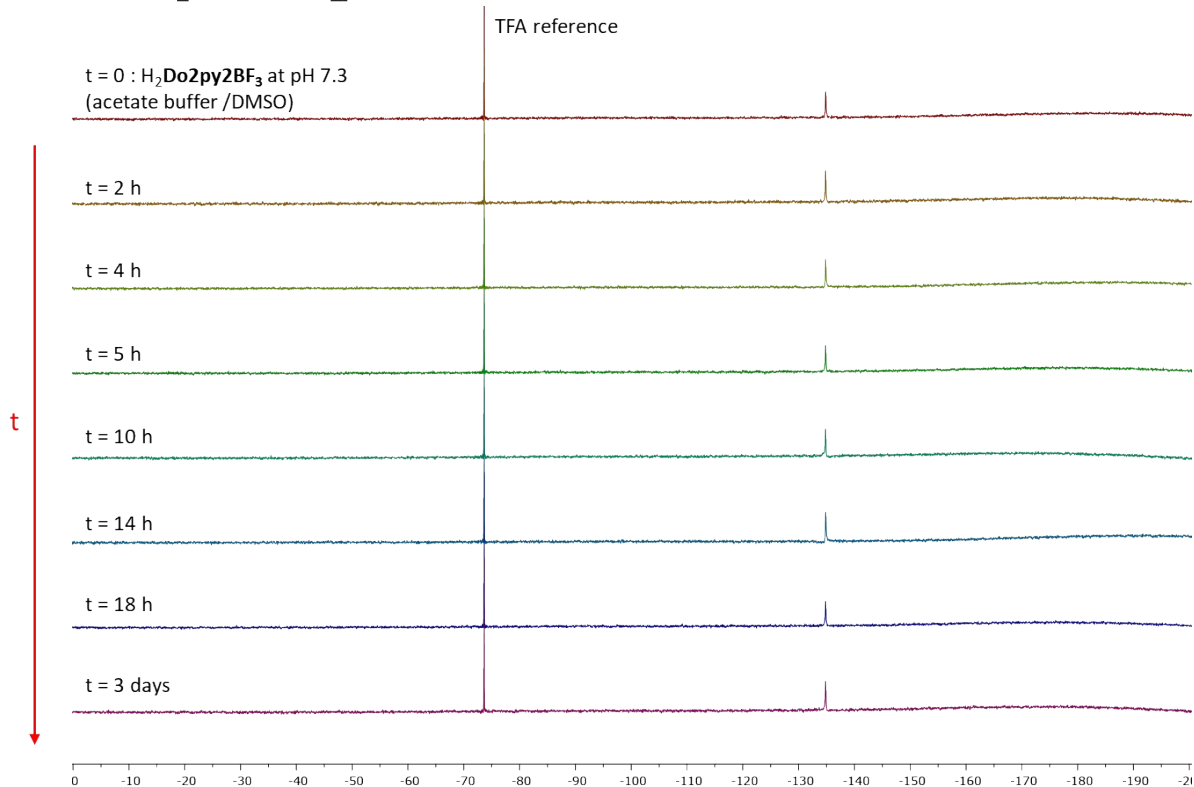

Figure S17: H<sub>2</sub>Do2py2BF<sub>3</sub> ligand (pH 9.7)

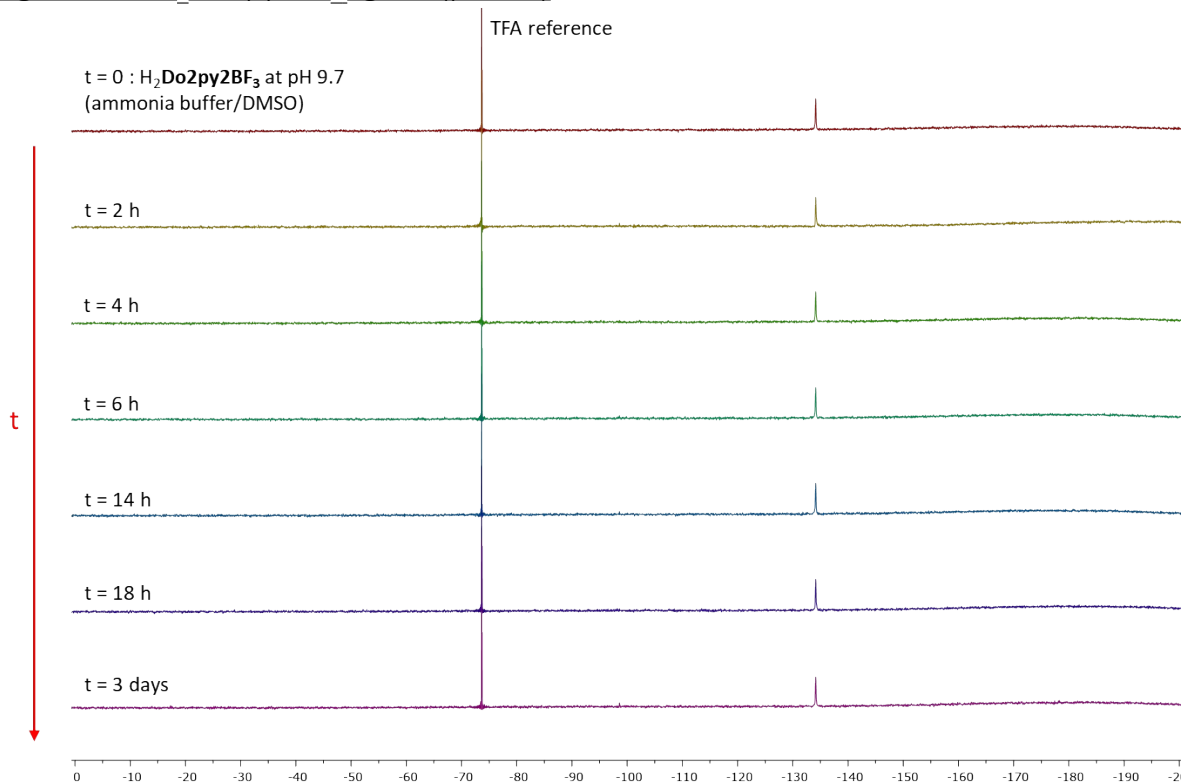

Figure S18: Zn(Do2py2BF<sub>3</sub>)<sub>2</sub> complex (pH 2)

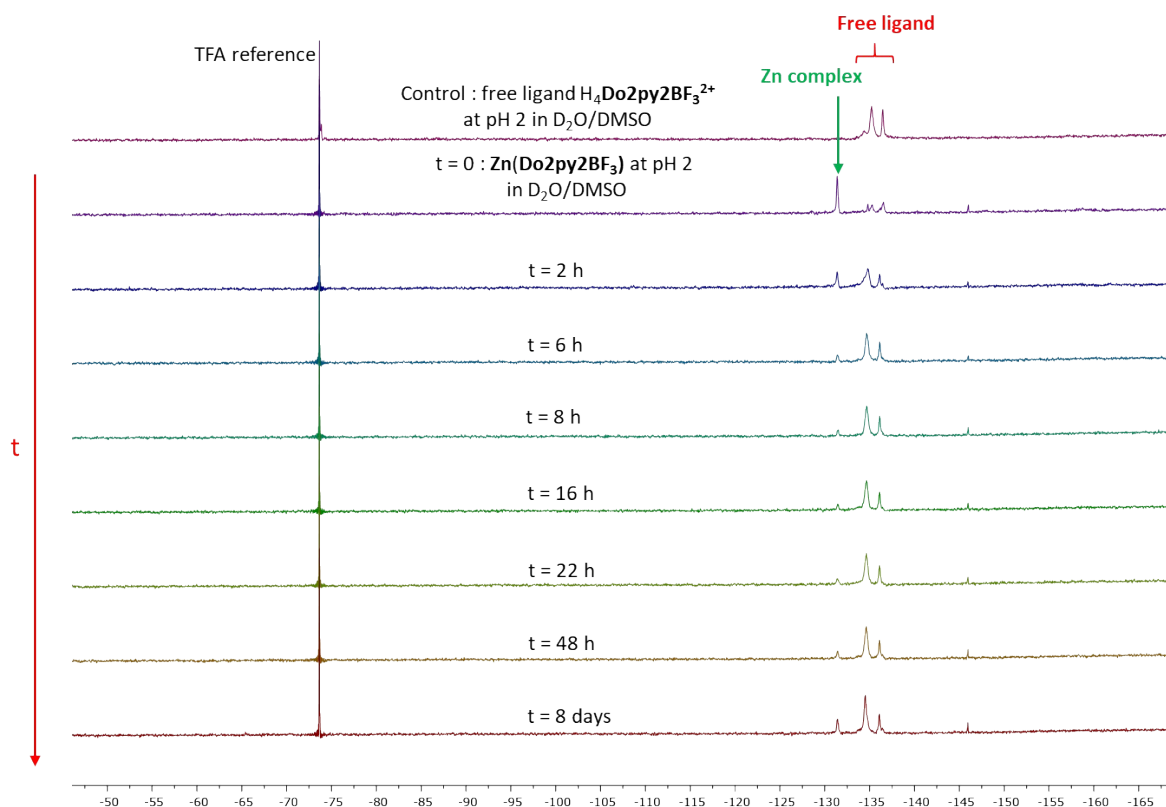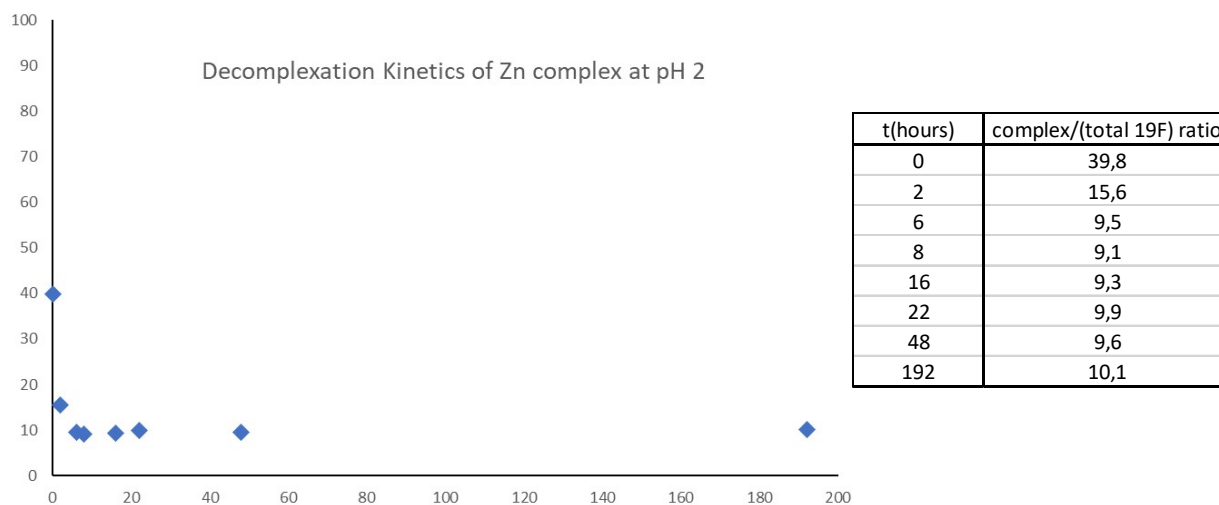

Data from integration of <sup>19</sup>F spectrum with TFA (capillary) as reference

Nb : t=0 corresponds to the first <sup>19</sup>F NMR measurement which is <5 minutes when taking into account the time required for spectrometer setting + acquisition time. t<sub>1/2</sub> can therefore only be estimated as < 5 minutes.

Figure S19: Zn(Do2py2BF<sub>3</sub>) complex (pH 7.3)

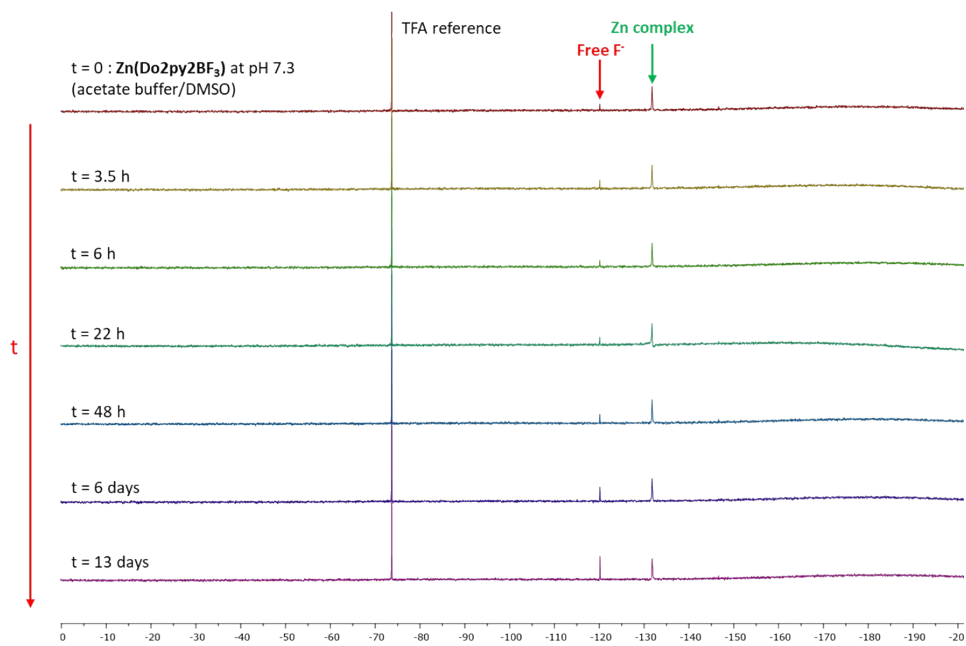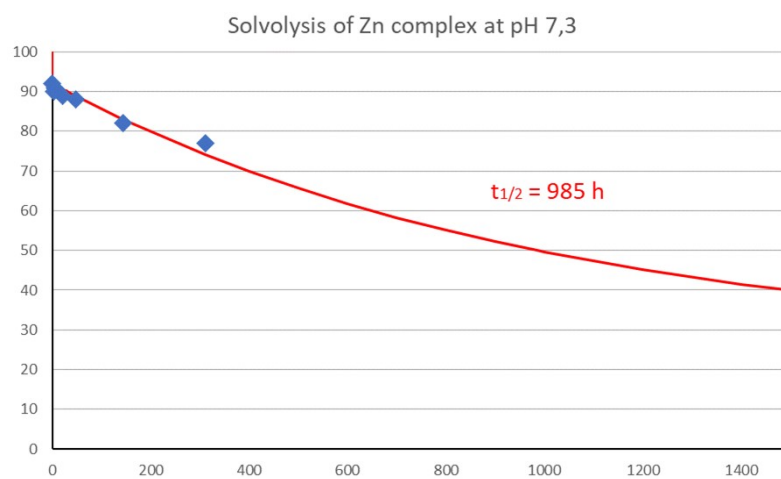

Data from integration of <sup>19</sup>F spectrum with TFA (capillary) as reference

| t(hours) | complex/(total 19F) ratio |
|----------|---------------------------|
| 0        | 92                        |
| 3,5      | 90                        |
| 6        | 91                        |
| 22       | 89                        |
| 48       | 88                        |
| 144      | 82                        |
| 312      | 77                        |

Figure S20: Zn(Do2py2BF<sub>3</sub>) complex (pH 9.7)

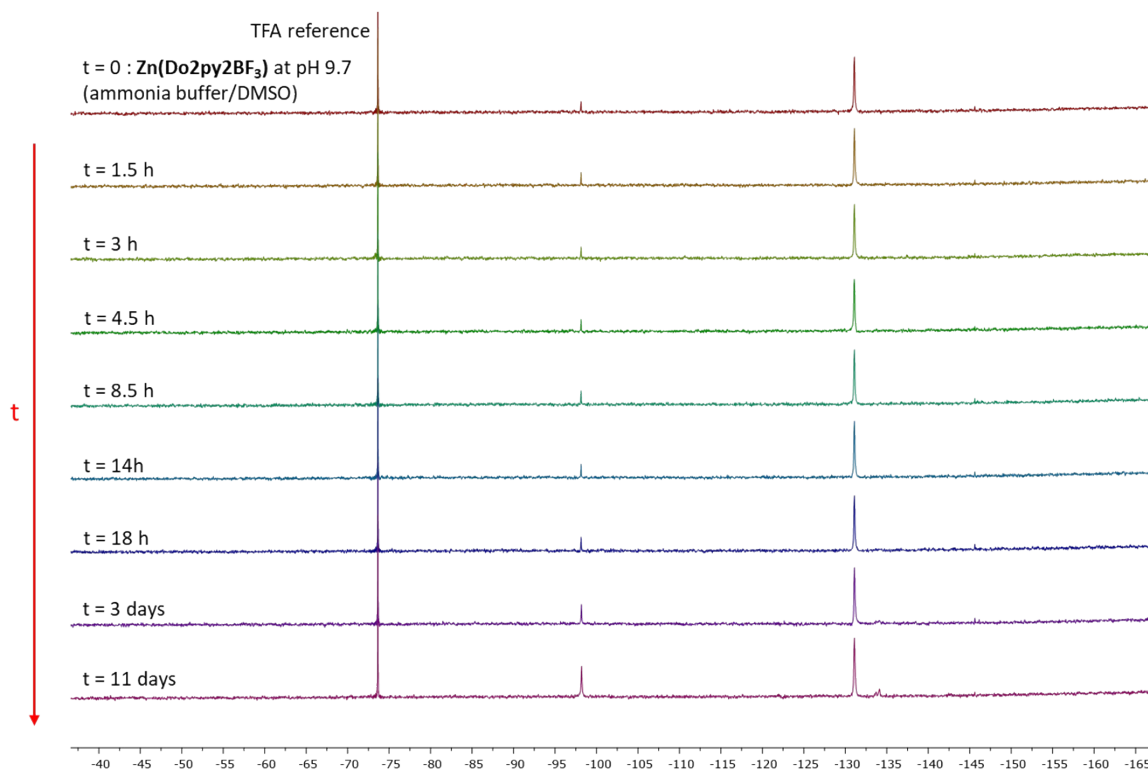

| t(hours) | complex/(total 19F) ratio |
|----------|---------------------------|
| 0        | 95                        |
| 1,5      | 94                        |
| 3        | 91                        |
| 4,5      | 92                        |
| 8,5      | 91                        |
| 13,5     | 91                        |
| 18       | 90                        |
| 72       | 83                        |
| 264      | 63                        |

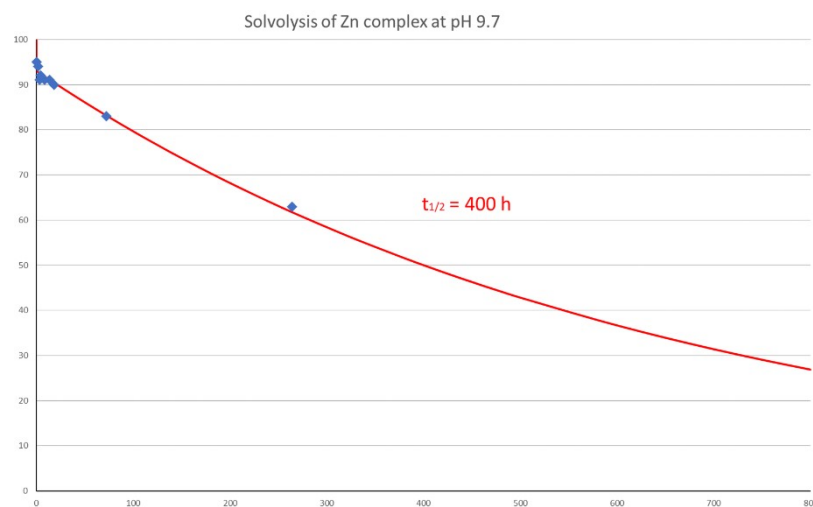

Data from integration of <sup>19</sup>F spectrum with TFA (capillary) as reference

## <sup>18</sup>F-Radiolabeling

All solvents and reagents were purchased from commercial suppliers, namely Sigma Aldrich or VWR, and were used as received without further purification. Sep-Pak® Accell Plus QMA Plus Light Cartridges were purchased from Waters Corporation and were pre-conditioned with 2 ml of TBABr (10 mg/mL in H<sub>2</sub>O) and rinsed with 18 mL of water.

[<sup>18</sup>F] fluoride was produced by CYROI via the <sup>18</sup>O(p,n)<sup>18</sup>F nuclear reaction with a GE cyclotron (PETtrace 800, 16.5 MeV). The bombardment of <sup>18</sup>O-enriched water with protons at 80 µA during 15 min provided about 30 GBq of [<sup>18</sup>F]-fluoride in <sup>18</sup>O-enriched water (4 mL), then the activity was directly transferred under helium pressure to the radiosynthesis automate. A remote controlled GE TracerLab FX FN module was used for the automated radiolabeling experiments. Helium was used as a pressurizing gas during sample transfers.

For the RadioChemical Yields (RCY) measurements, the HPLC analysis were performed on a UPLC Ultimate 3000 system (Thermo fisher Scientific) equipped with a UV spectrophotometer and a Berthold Flowstar LB 514 radioactivity detector, column: Gemini C18, 250 × 4.6 mm, 5µm (Phenomenex), Elution condition : NH<sub>4</sub>OAc 0.1M (pH 10) (A) /MeCN (B) from 0 to 1 min 90/10 (A/B); a gradient from 1 min to 21 min to reach 20/80 (A/B) until 25 min, then to 26 min 90/10 (A/B); flow rate: 1 mL/min; room temperature, UV detection λ=258 nm.

### **Automated radiosynthesis**

After the end of bombardment (EOB), the [<sup>18</sup>F] fluoride (30 GBq) was delivered to the automate and trapped on a pre-conditioned Sep-Pak Accell Plus QMA Plus Light Cartridge to remove <sup>18</sup>O-enriched water and others impurities. The whole activity was released from the cartridge into the reaction vessel by the aqueous solution of TBABr (16 mg in 0.5 mL) in vial 1 to form [<sup>18</sup>F]tetrabutylammonium fluoride ([<sup>18</sup>F]TBAF). 1 mL of acetonitrile from vial 2 was poured into the reaction vessel to provide anhydrous [<sup>18</sup>F]TBAF thanks to an azeotropic distillation under vacuum and helium flow by heating at 100°C. A solution containing the 1 mg of ligand H<sub>2</sub>Do<sub>2</sub>py<sub>2</sub>BF<sub>3</sub> in 1 ml acetonitrile or Zn(Do<sub>2</sub>py<sub>2</sub>BF<sub>3</sub>) in 1mL DMSO was poured into the reactor by applying helium pressure on vial 3. The mixture was stirred for 30 min at 80°C. The resulting solution was sucked into a vial. A sample was taken for analysis. The HPLC vial was measured into a shielded glove box with dose calibrator Scintidose (Lemer Pax) before and after the HPLC injection (10µL).

Figure S21: Scheme of TRACERLab FX FN module.

V1: 16 mg of TBABr in 0.5 mL water. V2: 1 mL of acetonitrile. V3: 1 mg of ligand in 1 mL of acetonitrile or DMSO

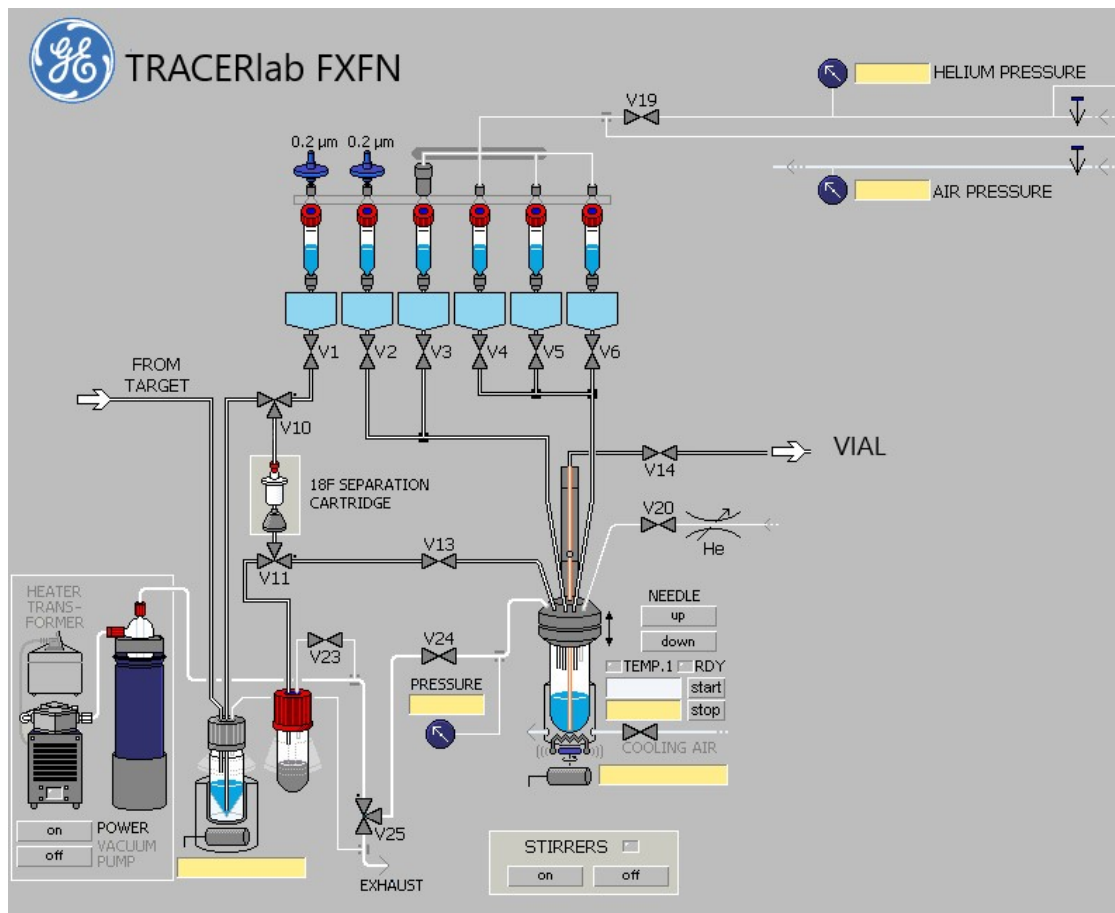

Figure S22: HPLC analysis of  $H_2Do2Py2BF_3$  radiolabeling.

Elution condition:  $NH_4OAc$  0.1M (pH 10) (A) /MeCN (B) from 0 to 1 min 90/10 (A/B); a gradient from 1 min to 21 min to reach 20/80 (A/B) until 25 min, then to 26 min 90/10 (A/B); flow rate: 1 mL/min; room temperature, UV detection  $\lambda=258$  nm and radioactivity detector (Berthold Flowstar LB 514).

[1]  $H_2Do2Py2BF_3$  0.5 mg/mL in ACN (UV 258 nm).

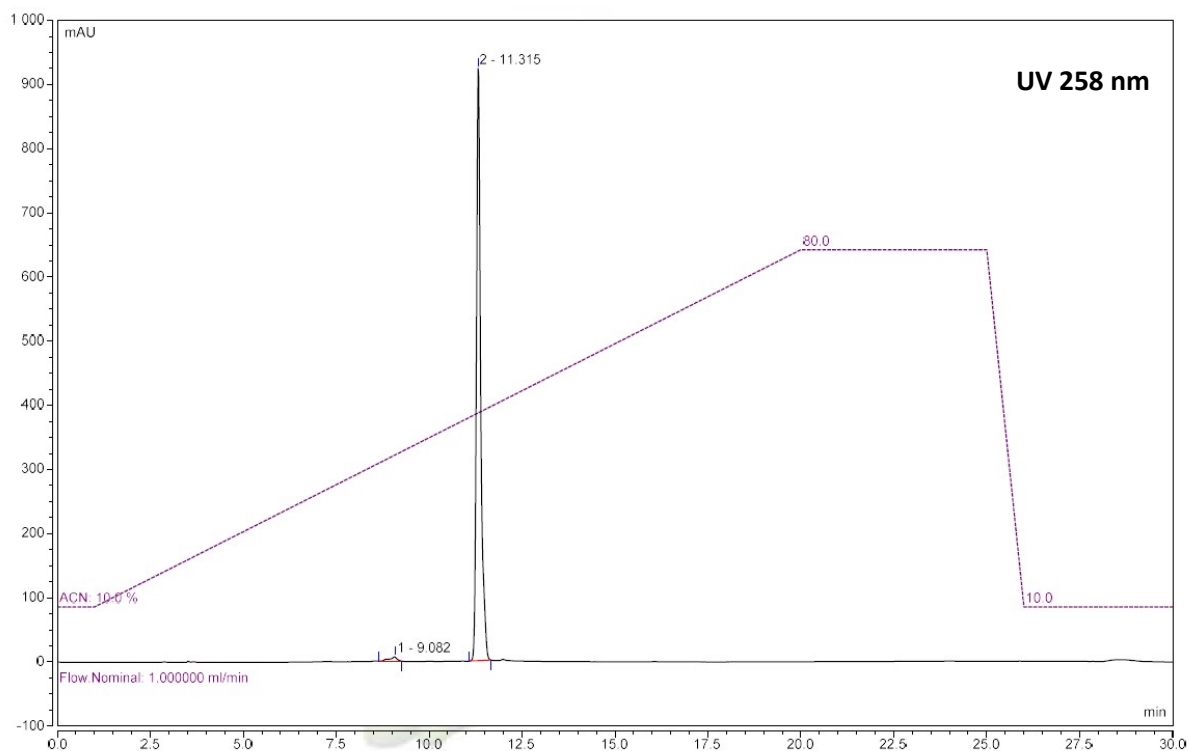

[2] Radio spectrum of [18F] H<sub>2</sub>Do2Py2BF<sub>3</sub> in ACN.

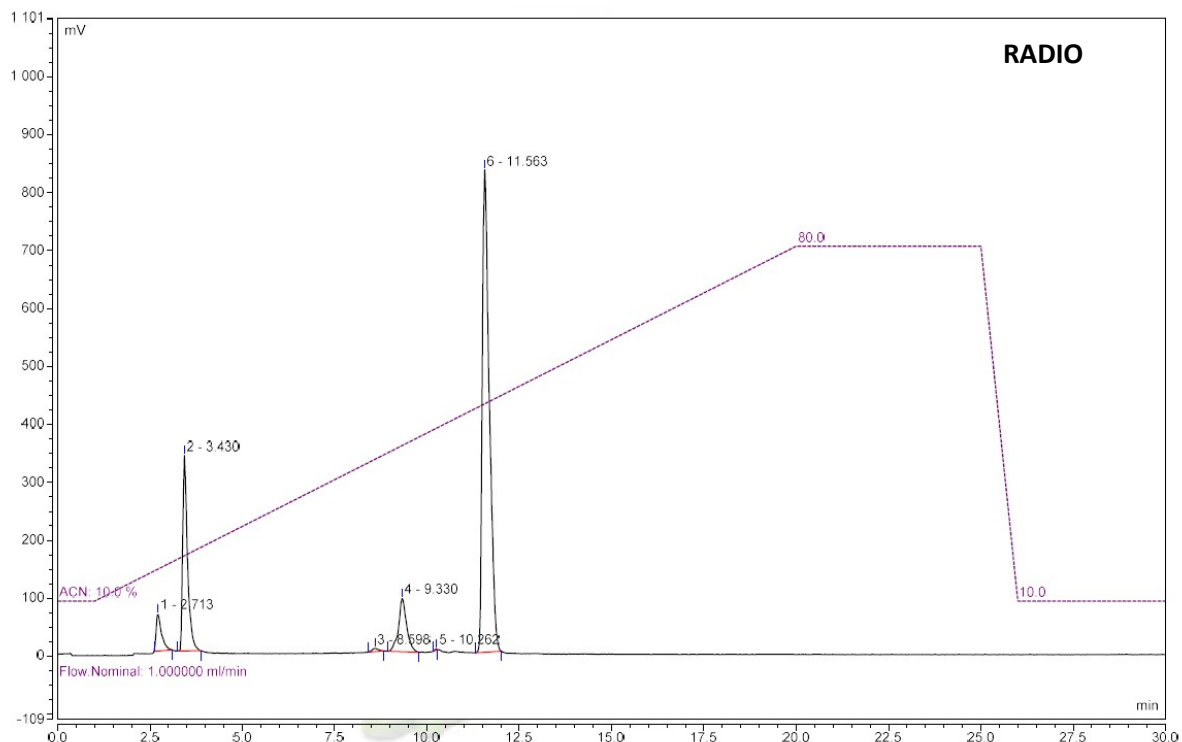

[3] UV spectrum of [18F] H<sub>2</sub>Do2Py2BF<sub>3</sub> in ACN

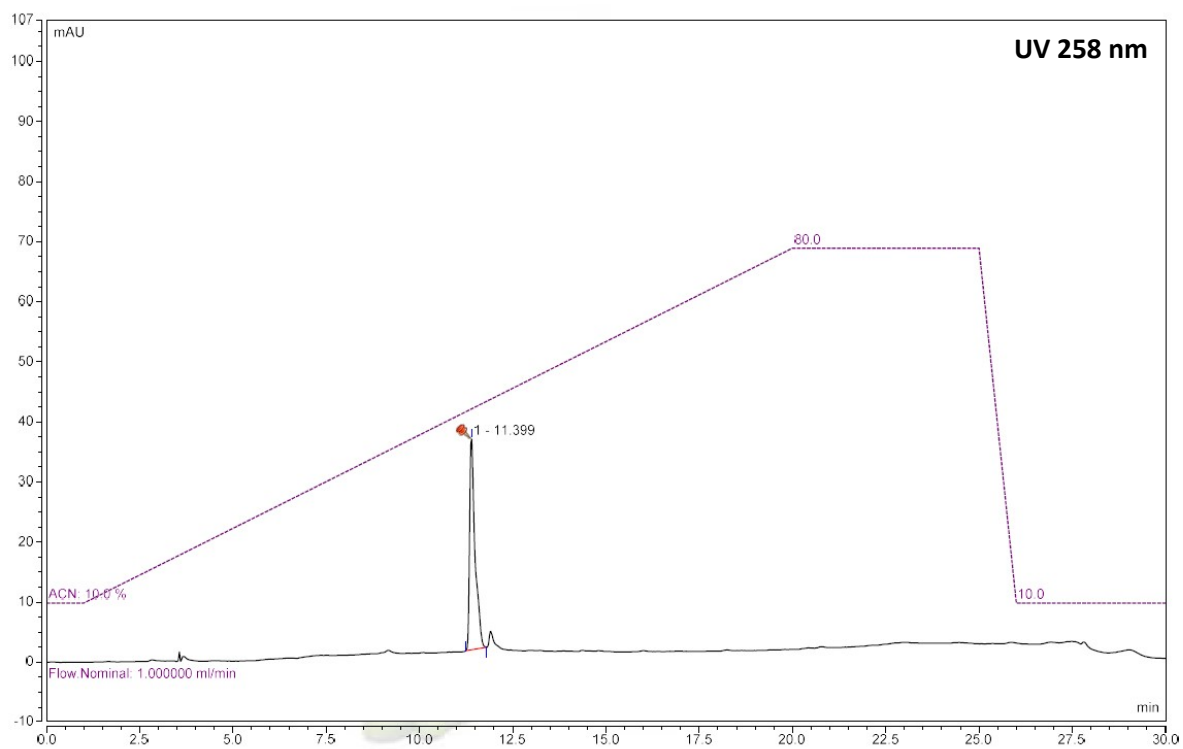



Figure S23: HPLC analysis of Zn(Do<sub>2</sub>Py<sub>2</sub>BF<sub>3</sub>) radiolabeling.

Elution condition: NH<sub>4</sub>OAc 0.1M (pH 10) (A) /MeCN (B) from 0 to 1 min 90/10 (A/B); a gradient from 1 min to 21 min to reach 20/80 (A/B) until 25 min, then to 26 min 90/10 (A/B); flow rate: 1 mL/min; room temperature, UV detection  $\lambda=258$  nm and radioactivity detector (Berthold Flowstar LB 514).

*[1] Zn-Do<sub>2</sub>Py<sub>2</sub>BF<sub>3</sub> 0.5 mg/mL in DMSO (UV 258 nm);*

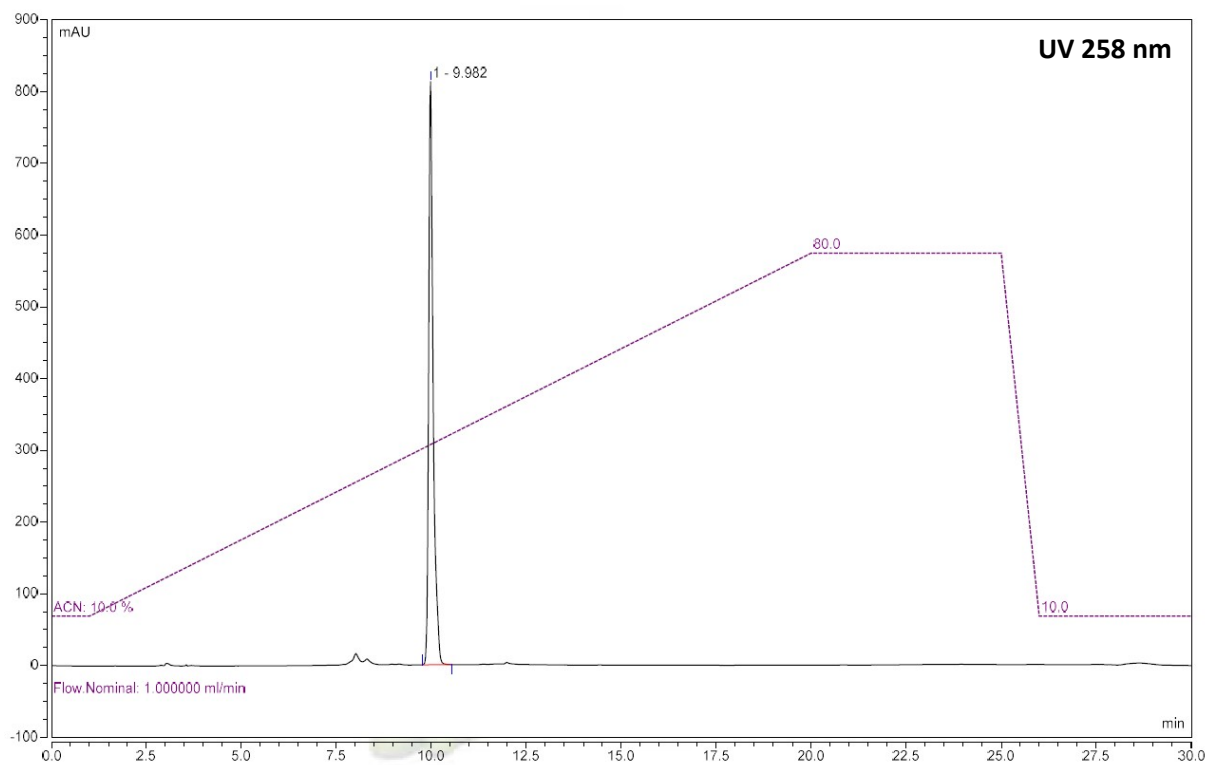

[2] Radio spectrum of [<sup>18</sup>F] Zn-Do<sub>2</sub>Py<sub>2</sub>BF<sub>3</sub> in DMSO

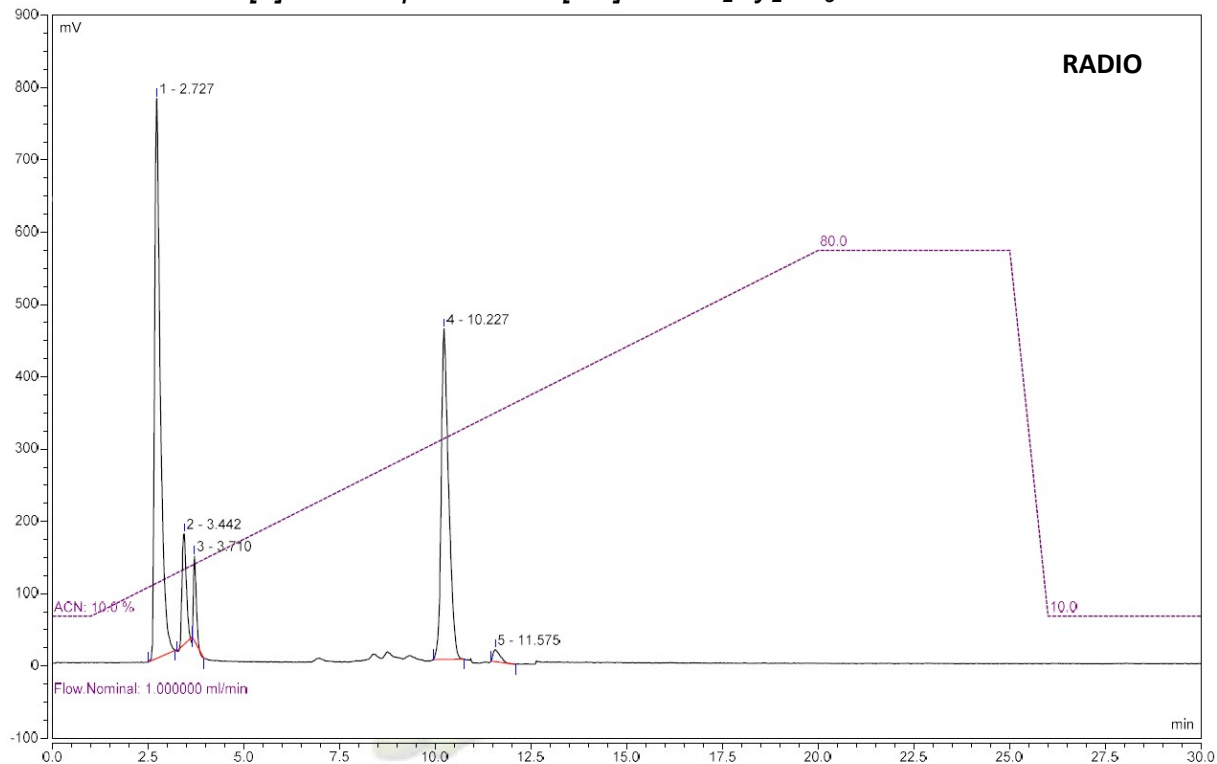

[3] UV spectrum of [<sup>18</sup>F] Zn-Do<sub>2</sub>Py<sub>2</sub>BF<sub>3</sub> in DMSO.

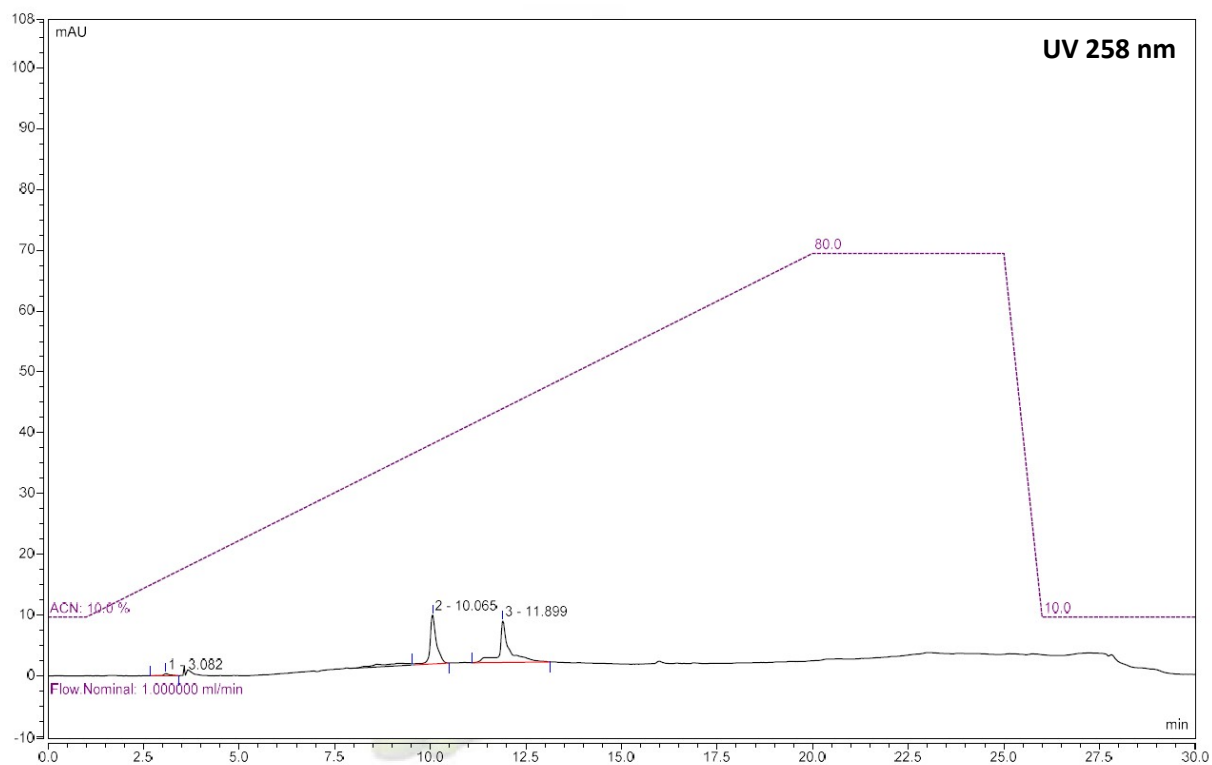

## <sup>19</sup>F-Magnetic Resonance

Zn(Do2py2BF<sub>3</sub>) was dissolved in CH<sub>3</sub>CN:H<sub>2</sub>O (1:1) at a concentration of 18.5 mg/mL (31.8 mM, 190.8 mM in <sup>19</sup>F).

1H MRI: Rare sequence, Repetition Time (TR) = 4145 ms, Echo Time (TE) = 7.67 ms, Rare Factor (RF) = 32, Number of Averages (NAV) = 4, Field of View (FOV) = 35 x 35 mm, Matrix = 256 x 256, Slice Thickness = 2 mm, Acquisition Time = 2 min 12 s.

<sup>19</sup>F MRI: Rare sequence, TR = 2000 ms, TE = 38.1 ms, RF = 24, FOV = 35 x 35 mm, Matrix = 32 x 32, Slice Thickness = 2 mm, NAV = 300, 1350 or 1800 corresponding to an Acquisition Time of = 10, 45 or 60 min respectively,  $\delta$ p = -134.5 ppm, Spectral width = 20000 Hz. The acquired image was then reconstructed with a 256 x 256 matrix (bicubic interpolation) in order to superimpose it to the 1H MR image. Image analysis was carried out with ImageJ: selected Regions of Interest (ROIs) were drawn on the different samples of the phantom and the mean signal intensity in each sample was measured. Then the SI was plotted against the <sup>19</sup>F concentration values.

Figure S24: <sup>19</sup>F Signal Intensity values at 7T

Signal intensity determined by <sup>19</sup>F MRI reported against <sup>19</sup>F mM concentration (N AV 1800, Acq Time 60 min, Slice Thickness 2 mm, Matrix 32x32).

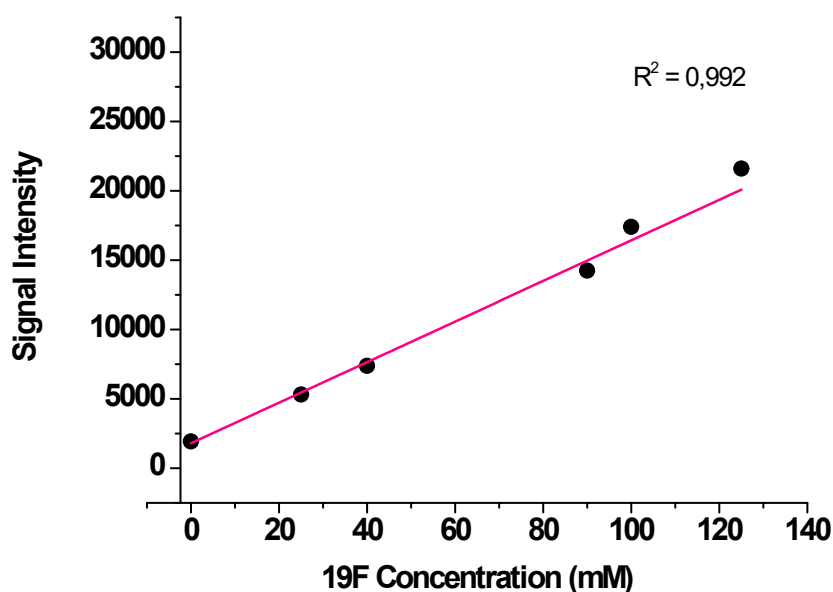

## References

- [1] J.-F. Morfin, R. Tripier, M. L. Baccon, H. Handel, *Polyhedron* **2009**, *28*, 3691–3698.
- [2] N. Bernier, J. Costa, R. Delgado, V. Félix, G. Royal, R. Tripier, *Dalton Trans.* **2011**, *40*, 4514–4526.
